# Supplementary material
Source: ML conference proceedings conference paper supplement (https://proceedings.neurips.cc/paper_files/paper/2018/hash/59a3adea76fadcb6dd9e54c96fc155d1-Abstract.html)
Supplement: Supplementary file [file 59a3adea76fadcb6dd9e54c96fc155d1-Supplemental.zip]

---

# Supplementary Material to An Improved Analysis of Alternating Minimization for Structured Multi-Response Regression

---

**Sheng Chen**  
The Voleon Group  
chen2832@umn.edu

**Arindam Banerjee**  
Dept. of Computer Science & Engineering  
University of Minnesota, Twin Cities  
banerjee@cs.umn.edu

## Abstract

In this supplementary material, we present the proofs of the theoretical results in the main paper. For the ease of exposition, instead of showing the proofs directly, we give a detailed analysis, with several intermediate results included.

## 1 Preliminaries

Our proofs heavily rely on the advanced probability tool, generic chaining [3]. Typically the results in generic chaining are characterized by the so-called  $\gamma_2$ -functional or its variants [3, 2], whose definitions are complicated. Thanks to the *majorizing measure theorem* (e.g., Theorem 2.4.1 in [4]), we can express those results in terms of Gaussian width, which is sufficient for our purpose. In particular, the following conclusion is adopted from Theorem 2.2.27 in [4].

**Theorem S.1** *Let  $\{Z_t\}_{t \in \mathcal{T}}$  be a stochastic process indexed by  $\mathcal{T} \subseteq \mathbb{R}^p$ , which satisfies*

$$\sup_{t, t' \in \mathcal{T}} \frac{\|Z_t - Z_{t'}\|_{\psi_2}}{\|t - t'\|_2} \leq K < +\infty.$$

*There exist absolute constants  $C_0$  and  $C_1$  such that the following bound holds with probability at least  $1 - C_1 \exp\left(-\frac{w^2(\mathcal{T})}{\text{diam}^2(\mathcal{T})}\right)$ ,*

$$\sup_{t, t' \in \mathcal{T}} |Z_t - Z_{t'}| \leq C_0 K \cdot w(\mathcal{T}), \quad (\text{S.1})$$

where  $\text{diam}(\mathcal{T}) = \sup_{t, t' \in \mathcal{T}} \|t - t'\|_2$ .

In some of the proofs, we also need to bound product processes, which can be handled by the following theorem. This result is essentially a simplified version of Theorem 1.13 in [2]. The original theorem contains a few more tunable variables, which are not central to the core idea and thus have been hidden.

**Theorem S.2** *Let  $(\Omega, \mu)$  be a probability space, and  $Z_1, Z_2, \dots, Z_n$  be an i.i.d. sample distributed according to  $\mu$ . Suppose that  $\mathcal{F} = \{f_a\}_{a \in \mathcal{A}}$  and  $\mathcal{H} = \{h_b\}_{b \in \mathcal{B}}$  are two function classes defined on  $(\Omega, \mu)$ , which are indexed by  $\mathcal{A} \subseteq \mathbb{R}^p$  and  $\mathcal{B} \subseteq \mathbb{R}^q$  respectively. Assume that*

$$\begin{aligned} \sup_{f \in \mathcal{F}} \|f\|_{\psi_2} &\leq R_{\mathcal{F}} < +\infty, & \sup_{h \in \mathcal{H}} \|h\|_{\psi_2} &\leq R_{\mathcal{H}} < +\infty, \\ \sup_{a, a' \in \mathcal{A}} \frac{\|f_a - f_{a'}\|_{\psi_2}}{\|a - a'\|_2} &\leq K_{\mathcal{F}} < +\infty, & \sup_{b, b' \in \mathcal{B}} \frac{\|h_b - h_{b'}\|_{\psi_2}}{\|b - b'\|_2} &\leq K_{\mathcal{H}} < +\infty, \end{aligned}$$

and denote

$$\varepsilon = \min \left\{ \frac{K_{\mathcal{F}} \cdot w(\mathcal{A})}{R_{\mathcal{F}}}, \frac{K_{\mathcal{H}} \cdot w(\mathcal{B})}{R_{\mathcal{H}}} \right\}.$$

There exist absolute constants  $C_0$ ,  $C_1$  and  $C_2$  such that if  $n \geq C_0 \varepsilon^2$ , the following inequality holds with probability at least  $1 - 2 \exp(-C_1 \varepsilon^2)$ ,

$$\sup_{f \in \mathcal{F}} \sup_{h \in \mathcal{H}} \left| \frac{1}{n} \sum_{i=1}^n f(Z_i) h(Z_i) - \mathbb{E}[fh] \right| \leq C_2 \cdot \frac{R_{\mathcal{H}} K_{\mathcal{F}} \cdot w(\mathcal{A}) + R_{\mathcal{F}} K_{\mathcal{H}} \cdot w(\mathcal{B})}{\sqrt{n}} \quad (\text{S.2})$$

The theorem above immediately leads to the following corollary.

**Corollary S.1** *Under the setting of Theorem S.2, if  $\mathcal{F} = \mathcal{H}$  and  $\mathcal{A} = \mathcal{B}$ , then there exist absolute constants  $C_0$ ,  $C_1$  and  $C_2$  such that if  $n \geq C_0 \left( \frac{K_{\mathcal{F}} \cdot w(\mathcal{A})}{R_{\mathcal{F}}} \right)^2$ , the following inequality holds with probability at least  $1 - 2 \exp \left( -C_1 \left( \frac{K_{\mathcal{F}} \cdot w(\mathcal{A})}{R_{\mathcal{F}}} \right)^2 \right)$ ,*

$$\sup_{f \in \mathcal{F}} \left| \frac{1}{n} \sum_{i=1}^n f^2(Z_i) - \mathbb{E}[f^2] \right| \leq C_2 \cdot \frac{R_{\mathcal{F}} K_{\mathcal{F}} \cdot w(\mathcal{A})}{\sqrt{n}} \quad (\text{S.3})$$

The following lemma is also useful in the proof, which essentially states that the concatenation of independent sub-Gaussian random vectors is also sub-Gaussian.

**Lemma S.1** *If  $\mathbf{x}_1, \mathbf{x}_2, \dots, \mathbf{x}_n$  are all  $m$ -dimensional independent centered sub-Gaussian random vectors, then  $\mathbf{x} = [\mathbf{x}_1^T, \dots, \mathbf{x}_n^T]^T \in \mathbb{R}^{mn}$  is also a centered sub-Gaussian random vector with*

$$\|\mathbf{x}\|_{\psi_2} \leq C \max_{1 \leq i \leq n} \|\mathbf{x}_i\|_{\psi_2}, \quad (\text{S.4})$$

where  $C$  is an absolute constant.

*Proof:* Define  $\mathbf{a} = [\mathbf{a}_1^T, \mathbf{a}_2^T, \dots, \mathbf{a}_n^T]^T \in \mathbb{S}^{mn-1}$ , where each  $\mathbf{a}_i$  is  $m$ -dimensional. We have

$$\begin{aligned} \|\langle \mathbf{x}, \mathbf{a} \rangle\|_{\psi_2} &= \left\| \sum_{i=1}^n \langle \mathbf{x}_i, \mathbf{a}_i \rangle \right\|_{\psi_2} \leq \sqrt{C^2 \sum_{i=1}^n \|\langle \mathbf{x}_i, \mathbf{a}_i \rangle\|_{\psi_2}^2} \leq \sqrt{C^2 \sum_{i=1}^n \|\mathbf{a}_i\|_2^2 \|\mathbf{x}_i\|_{\psi_2}^2} \\ &\leq \sqrt{C^2 \sum_{i=1}^n \|\mathbf{a}_i\|_2^2} \cdot \max_{1 \leq i \leq n} \|\mathbf{x}_i\|_{\psi_2} = C \max_{1 \leq i \leq n} \|\mathbf{x}_i\|_{\psi_2}, \end{aligned}$$

where we use Lemma 5.9 in [5] for the first inequality. Based on the definition of sub-Gaussian random vector, we complete the proof.  $\blacksquare$

Our analysis is organized as follows. In Section 2, we first give the deterministic error bounds for the distance function  $d_1$ ,  $d_2$  and the AltMin procedure, under certain conditions. Then we show in Section 3 that those conditions will hold with high probability given our stochastic assumptions. Finally the results in the main paper are directly implied by combining the analysis in Section 2 and 3. Throughout the analysis,  $C_0, C_1, c_0, c_1$  and so on are reserved for absolute constants. Standard order notations such as  $o(\cdot)$ ,  $O(\cdot)$  and  $\Omega(\cdot)$  are used to denote the corresponding growth rates.

## 2 Deterministic Analysis

In this section, we first bound the distance function  $d_1$  and  $d_2$  defined in Definition 1. We start with a few definitions.

**Definition S.1 (uniformly restricted eigenvalue)** For designs  $\mathbf{X}_1, \mathbf{X}_2, \dots, \mathbf{X}_n$ , the smallest uniformly restricted eigenvalue (URE) for error spherical cap  $\mathcal{C} \subseteq \mathbb{S}^{p-1}$  is defined as

$$\alpha_n^- \triangleq \inf_{\mathbf{v} \in \mathbb{S}^{m-1}} \inf_{\mathbf{u} \in \mathcal{C}} \mathbf{u}^T \left( \frac{1}{n} \sum_{i=1}^n \mathbf{X}_i^T \mathbf{v} \mathbf{v}^T \mathbf{X}_i \right) \mathbf{u} \quad (\text{S.5})$$

Similarly the largest URE is given as

$$\alpha_n^+ \triangleq \sup_{\mathbf{v} \in \mathbb{S}^{m-1}} \sup_{\mathbf{u} \in \mathcal{C}} \mathbf{u}^T \left( \frac{1}{n} \sum_{i=1}^n \mathbf{X}_i^T \mathbf{v} \mathbf{v}^T \mathbf{X}_i \right) \mathbf{u} \quad (\text{S.6})$$

In comparison with the standard restricted eigenvalue [1], the uniformity of the URE is reflected by the infimum and the supremum operation over  $\mathbf{v} \in \mathbb{S}^{m-1}$  in the above definitions.

**Definition S.2 (type-I noise-design interaction strength)** For designs  $\mathbf{X}_1, \mathbf{X}_2, \dots, \mathbf{X}_n$  and untransformed noises  $\tilde{\eta}_1, \tilde{\eta}_2, \dots, \tilde{\eta}_n$ , the type-I noise-design interaction (NDI) strength is defined as

$$\gamma_n \triangleq \sup_{\mathbf{u} \in \mathcal{C}} \left\| \frac{2}{n} \sum_{i=1}^n \mathbf{X}_i \mathbf{u} \tilde{\eta}_i^T \right\|_2 \quad (\text{S.7})$$

**Definition S.3 (type-II noise-design interaction strength)** For designs  $\mathbf{X}_1, \mathbf{X}_2, \dots, \mathbf{X}_n$  and noises  $\eta_1, \eta_2, \dots, \eta_n$ , the type-II noise-design interaction (NDI) strength  $\beta_n$  for a set of matrices  $\mathcal{K}$  is defined as

$$\beta_n(\mathcal{K}) \triangleq \sup_{\Sigma \in \mathcal{K}} \sup_{\mathbf{u} \in \mathcal{C}} \frac{2}{n} \sum_{i=1}^n \frac{\eta_i^T \Sigma^{-1} \mathbf{X}_i \mathbf{u}}{\|\Sigma^{1/2} \Sigma^{-1}\|_F}, \quad (\text{S.8})$$

where the invertibility is assumed for every  $\Sigma \in \mathcal{K}$ .

In the analysis, we specifically focus on  $\beta_n(\mathcal{M}(e_0))$ , as  $\mathcal{M}(e_0)$  defined in (16) is the set of input  $\Sigma$  under consideration. From its definition, it is not difficult to see that  $\beta_n(\mathcal{M}(e_0))$  is a monotonically increasing function of  $e_0$ , as  $\mathcal{M}(e_0) \subseteq \mathcal{M}(e'_0)$  for any  $e_0 \leq e'_0$ . In the probabilistic analysis, we will bound  $\beta_n(\mathcal{M}(e_0))$  at specific values of  $e_0$ . With the definitions presented above, we are ready to give the deterministic guarantees for the  $\Sigma$ -step and the  $\theta$ -step in (13) and (14).

**Lemma S.2 (deterministic error bound for  $\Sigma$ -estimation)** Given data  $\{(\mathbf{X}_i, \mathbf{y}_i)\}_{i=1}^n$ , let  $\{\delta_n\}$  be a sequence such that

$$\left\| \frac{1}{n} \sum_{i=1}^n \tilde{\eta}_i \tilde{\eta}_i^T - \mathbf{I} \right\|_2 \leq \delta_n. \quad (\text{S.9})$$

If  $\frac{\delta_n \alpha_n^-}{\gamma_n^2} \geq \frac{\sigma_*^+}{4\sigma_*^-}$  and  $\delta_n \leq \frac{1}{4}$ , then  $\hat{\Sigma}(\theta)$  given in (13) is invertible for any  $\theta \in \mathcal{R}$  and its error satisfies

$$d_1(\hat{\Sigma}(\theta), \Sigma_*) \leq 4\delta_n + 2\sqrt{\frac{\alpha_n^+}{\sigma_*^-}} \cdot d_2(\theta, \theta_*). \quad (\text{S.10})$$

*Proof:* We will use the shorthand notation  $\hat{\Sigma}$  for  $\hat{\Sigma}(\theta)$ .

$$\begin{aligned} \frac{\xi(\hat{\Sigma})}{\xi(\Sigma_*)} &= \frac{\sqrt{\text{Tr}(\hat{\Sigma}^{-1} \Sigma_* \hat{\Sigma}^{-1})}}{\xi(\Sigma_*) \text{Tr}(\hat{\Sigma}^{-1})} = \sqrt{\frac{\text{Tr}(\Sigma_*^{-1}) \cdot \text{Tr}(\hat{\Sigma}^{-1} \Sigma_* \hat{\Sigma}^{-1})}{\text{Tr}^2(\hat{\Sigma}^{-1})}} \\ &= \sqrt{\frac{\text{Tr}(\hat{\Sigma}^{\frac{1}{2}} \Sigma_*^{-1} \hat{\Sigma}^{\frac{1}{2}} \hat{\Sigma}^{-1}) \cdot \text{Tr}(\hat{\Sigma}^{-\frac{1}{2}} \Sigma_* \hat{\Sigma}^{-\frac{1}{2}} \hat{\Sigma}^{-1})}{\text{Tr}^2(\hat{\Sigma}^{-1})}} \end{aligned}$$

$$\begin{aligned}
&\leq \sqrt{\frac{\lambda_{\max}(\hat{\Sigma}^{\frac{1}{2}} \Sigma_*^{-1} \hat{\Sigma}^{\frac{1}{2}}) \text{Tr}(\hat{\Sigma}^{-1}) \cdot \lambda_{\max}(\hat{\Sigma}^{-\frac{1}{2}} \Sigma_* \hat{\Sigma}^{-\frac{1}{2}}) \text{Tr}(\hat{\Sigma}^{-1})}{\text{Tr}^2(\hat{\Sigma}^{-1})}} \\
&= \sqrt{\lambda_{\max}(\hat{\Sigma}^{\frac{1}{2}} \Sigma_*^{-1} \hat{\Sigma}^{\frac{1}{2}}) \lambda_{\max}(\hat{\Sigma}^{-\frac{1}{2}} \Sigma_* \hat{\Sigma}^{-\frac{1}{2}})} = \sqrt{\frac{\lambda_{\max}(\Sigma_*^{-\frac{1}{2}} \hat{\Sigma} \Sigma_*^{-\frac{1}{2}})}{\lambda_{\min}(\Sigma_*^{-\frac{1}{2}} \hat{\Sigma} \Sigma_*^{-\frac{1}{2}})}},
\end{aligned}$$

where the inequality follows from Von Neumann's trace inequality. Now we try to bound  $\lambda_{\max}(\Sigma_*^{-\frac{1}{2}} \hat{\Sigma} \Sigma_*^{-\frac{1}{2}})$  and  $\lambda_{\min}(\Sigma_*^{-\frac{1}{2}} \hat{\Sigma} \Sigma_*^{-\frac{1}{2}})$  separately. Note that any  $\theta$  given by the solution of the  $\theta$ -step in (14) satisfies that  $\frac{\theta - \theta_*}{\|\theta - \theta_*\|_2} \in \mathcal{C}$ . By the expression for  $\hat{\Sigma}$  in (13), we have for  $\lambda_{\max}(\Sigma_*^{-\frac{1}{2}} \hat{\Sigma} \Sigma_*^{-\frac{1}{2}})$ ,

$$\begin{aligned}
\lambda_{\max}(\Sigma_*^{-\frac{1}{2}} \hat{\Sigma} \Sigma_*^{-\frac{1}{2}}) &= 1 + \lambda_{\max}(\Sigma_*^{-\frac{1}{2}} \hat{\Sigma} \Sigma_*^{-\frac{1}{2}} - \mathbf{I}) = 1 + \left\| \Sigma_*^{-\frac{1}{2}} \hat{\Sigma} \Sigma_*^{-\frac{1}{2}} - \mathbf{I} \right\|_2 \\
&\leq 1 + \left\| \frac{1}{n} \sum_{i=1}^n \tilde{\eta}_i \tilde{\eta}_i^T - \mathbf{I} \right\|_2 + \left\| \frac{2}{n} \sum_{i=1}^n \Sigma_*^{-\frac{1}{2}} \mathbf{X}_i (\theta - \theta_*) \tilde{\eta}_i^T \right\|_2 \\
&\quad + \lambda_{\max} \left( \frac{1}{n} \sum_{i=1}^n \Sigma_*^{-\frac{1}{2}} \mathbf{X}_i (\theta - \theta_*) (\theta - \theta_*)^T \mathbf{X}_i^T \Sigma_*^{-\frac{1}{2}} \right) \\
&= 1 + \delta_n + \|\theta - \theta_*\|_2 \cdot \left\| \frac{2}{n} \sum_{i=1}^n \Sigma_*^{-\frac{1}{2}} \mathbf{X}_i \cdot \frac{\theta - \theta_*}{\|\theta - \theta_*\|_2} \cdot \tilde{\eta}_i^T \right\|_2 \\
&\quad + \|\theta - \theta_*\|_2^2 \cdot \sup_{\mathbf{v} \in \mathbb{S}^{m-1}} \mathbf{v}^T \left( \frac{1}{n} \sum_{i=1}^n \Sigma_*^{-\frac{1}{2}} \mathbf{X}_i \cdot \frac{(\theta - \theta_*)(\theta - \theta_*)^T}{\|\theta - \theta_*\|_2^2} \cdot \mathbf{X}_i^T \Sigma_*^{-\frac{1}{2}} \right) \mathbf{v} \\
&\leq 1 + \delta_n + \|\theta - \theta_*\|_2 \cdot \left\| \Sigma_*^{-\frac{1}{2}} \right\|_2 \cdot \sup_{\mathbf{u} \in \mathcal{C}} \left\| \frac{2}{n} \sum_{i=1}^n \mathbf{X}_i \mathbf{u} \tilde{\eta}_i^T \right\|_2 \\
&\quad + \|\theta - \theta_*\|_2^2 \cdot \left\| \Sigma_*^{-1} \right\|_2 \cdot \sup_{\mathbf{v} \in \mathbb{S}^{m-1}} \sup_{\mathbf{u} \in \mathcal{C}} \mathbf{u}^T \left( \frac{1}{n} \sum_{i=1}^n \mathbf{X}_i^T \mathbf{v} \mathbf{v}^T \mathbf{X}_i \right) \mathbf{u} \\
&= 1 + \delta_n + \frac{\gamma_n}{\sqrt{\sigma_*}} \|\theta - \theta_*\|_2 + \frac{\alpha_n^+}{\sigma_*} \|\theta - \theta_*\|_2^2
\end{aligned}$$

Similarly we bound  $\lambda_{\min}(\Sigma_*^{-\frac{1}{2}} \hat{\Sigma} \Sigma_*^{-\frac{1}{2}})$  as follows,

$$\begin{aligned}
\lambda_{\min}(\Sigma_*^{-\frac{1}{2}} \hat{\Sigma} \Sigma_*^{-\frac{1}{2}}) &= 1 + \lambda_{\min}(\Sigma_*^{-\frac{1}{2}} \hat{\Sigma} \Sigma_*^{-\frac{1}{2}} - \mathbf{I}) \\
&\geq 1 + \lambda_{\min} \left( \frac{1}{n} \sum_{i=1}^n \tilde{\eta}_i \tilde{\eta}_i^T - \mathbf{I} \right) \\
&\quad + \lambda_{\min} \left( \frac{1}{n} \sum_{i=1}^n \Sigma_*^{-\frac{1}{2}} \mathbf{X}_i (\theta - \theta_*) \tilde{\eta}_i^T + \frac{1}{n} \sum_{i=1}^n \tilde{\eta}_i (\theta - \theta_*)^T \mathbf{X}_i^T \Sigma_*^{-\frac{1}{2}} \right) \\
&\quad + \lambda_{\min} \left( \frac{1}{n} \sum_{i=1}^n \Sigma_*^{-\frac{1}{2}} \mathbf{X}_i (\theta - \theta_*) (\theta - \theta_*)^T \mathbf{X}_i^T \Sigma_*^{-\frac{1}{2}} \right) \\
&\geq 1 - \left\| \frac{1}{n} \sum_{i=1}^n \tilde{\eta}_i \tilde{\eta}_i^T - \mathbf{I} \right\|_2 - \left\| \frac{2}{n} \sum_{i=1}^n \Sigma_*^{-\frac{1}{2}} \mathbf{X}_i (\theta - \theta_*) \tilde{\eta}_i^T \right\|_2 \\
&\quad + \lambda_{\min} \left( \frac{1}{n} \sum_{i=1}^n \Sigma_*^{-\frac{1}{2}} \mathbf{X}_i (\theta - \theta_*) (\theta - \theta_*)^T \mathbf{X}_i^T \Sigma_*^{-\frac{1}{2}} \right)
\end{aligned}$$

$$\begin{aligned}
&\geq 1 - \delta_n - \|\boldsymbol{\theta} - \boldsymbol{\theta}_*\|_2 \cdot \left\| \boldsymbol{\Sigma}_*^{-\frac{1}{2}} \right\|_2 \cdot \sup_{\mathbf{u} \in \mathcal{C}} \left\| \frac{2}{n} \sum_{i=1}^n \mathbf{X}_i \mathbf{u} \tilde{\boldsymbol{\eta}}_i^T \right\|_2 \\
&\quad + \|\boldsymbol{\theta} - \boldsymbol{\theta}_*\|_2^2 \cdot \lambda_{\min}(\boldsymbol{\Sigma}_*^{-1}) \inf_{\mathbf{v} \in \mathbb{S}^{m-1}} \inf_{\mathbf{u} \in \mathcal{C}} \mathbf{u}^T \left( \frac{1}{n} \sum_{i=1}^n \mathbf{X}_i^T \mathbf{v} \mathbf{v}^T \mathbf{X}_i \right) \mathbf{u} \\
&= 1 - \delta_n - \frac{\gamma_n}{\sqrt{\sigma_*^-}} \|\boldsymbol{\theta} - \boldsymbol{\theta}_*\|_2 + \frac{\alpha_n^-}{\sigma_*^+} \|\boldsymbol{\theta} - \boldsymbol{\theta}_*\|_2^2
\end{aligned}$$

Combining the inequalities above, we obtain

$$\begin{aligned}
\frac{\xi(\hat{\boldsymbol{\Sigma}})}{\xi(\boldsymbol{\Sigma}_*)} &\leq \sqrt{\frac{1 + \delta_n + \frac{\gamma_n}{\sqrt{\sigma_*^-}} \|\boldsymbol{\theta} - \boldsymbol{\theta}_*\|_2 + \frac{\alpha_n^+}{\sigma_*^+} \|\boldsymbol{\theta} - \boldsymbol{\theta}_*\|_2^2}{1 - \delta_n - \frac{\gamma_n}{\sqrt{\sigma_*^-}} \|\boldsymbol{\theta} - \boldsymbol{\theta}_*\|_2 + \frac{\alpha_n^-}{\sigma_*^+} \|\boldsymbol{\theta} - \boldsymbol{\theta}_*\|_2^2}} \\
&\leq \sqrt{\frac{1 + 2\delta_n + \frac{\gamma_n^2}{4\sigma_*^- \delta_n} \|\boldsymbol{\theta} - \boldsymbol{\theta}_*\|_2^2 + \frac{\alpha_n^+}{\sigma_*^+} \|\boldsymbol{\theta} - \boldsymbol{\theta}_*\|_2^2}{1 - 2\delta_n - \frac{\gamma_n^2}{4\sigma_*^- \delta_n} \|\boldsymbol{\theta} - \boldsymbol{\theta}_*\|_2^2 + \frac{\alpha_n^-}{\sigma_*^+} \|\boldsymbol{\theta} - \boldsymbol{\theta}_*\|_2^2}} \quad \left( \text{follow from } 2\sqrt{ab} \leq a + b \text{ for } a, b \geq 0 \right) \\
&\leq \sqrt{\frac{1 + 2\delta_n + \frac{2\alpha_n^+}{\sigma_*^-} \|\boldsymbol{\theta} - \boldsymbol{\theta}_*\|_2^2}{1 - 2\delta_n}} \quad \left( \text{use the condition } \frac{\delta_n \alpha_n^-}{\gamma_n^2} \geq \frac{\sigma_*^+}{4\sigma_*^-} \right) \\
&\leq \sqrt{\frac{1 + 2\delta_n}{1 - 2\delta_n}} + \sqrt{\frac{2\alpha_n^+ \|\boldsymbol{\theta} - \boldsymbol{\theta}_*\|_2^2}{(1 - 2\delta_n) \sigma_*^-}} \quad \left( \text{follow from } \sqrt{a+b} \leq \sqrt{a} + \sqrt{b} \text{ for } a, b \geq 0 \right) \\
&\leq 1 + \frac{2\delta_n}{1 - 2\delta_n} + \sqrt{\frac{2\alpha_n^+ \|\boldsymbol{\theta} - \boldsymbol{\theta}_*\|_2^2}{(1 - 2\delta_n) \sigma_*^-}} \quad \left( \text{follow from } \sqrt{1+a} \leq 1 + \frac{a}{2} \text{ for } a \geq 0 \right) \\
&\leq 1 + 4\delta_n + 2\sqrt{\frac{\alpha_n^+}{\sigma_*^-}} \cdot \|\boldsymbol{\theta} - \boldsymbol{\theta}_*\|_2 \quad \left( \text{use the condition } \delta_n \leq \frac{1}{4} \right).
\end{aligned}$$

The invertibility of  $\hat{\boldsymbol{\Sigma}}$  is guaranteed by  $\lambda_{\min}(\boldsymbol{\Sigma}_*^{-\frac{1}{2}} \hat{\boldsymbol{\Sigma}} \boldsymbol{\Sigma}_*^{-\frac{1}{2}}) > \frac{1}{2}$  following from the derivation above.  $\blacksquare$

**Lemma S.3 (deterministic error bound for  $\boldsymbol{\theta}$ -estimation)** *Given data  $\{(\mathbf{X}_i, \mathbf{y}_i)\}_{i=1}^n$  and a set  $\mathcal{K} \subseteq \mathbb{R}^{m \times m}$  such that every  $\boldsymbol{\Sigma} \in \mathcal{K}$  is invertible, if the tuning parameter  $\lambda$  is set to  $f(\boldsymbol{\theta}_*)$ , then the following error bound holds for  $\hat{\boldsymbol{\theta}}(\boldsymbol{\Sigma})$  given in (14) with any input  $\boldsymbol{\Sigma} \in \mathcal{K}$ ,*

$$d_2(\hat{\boldsymbol{\theta}}(\boldsymbol{\Sigma}), \boldsymbol{\theta}_*) \leq \xi(\boldsymbol{\Sigma}) \cdot \frac{\beta_n(\mathcal{K})}{\alpha_n^-} = (1 + d_1(\boldsymbol{\Sigma}, \boldsymbol{\Sigma}_*)) \cdot \xi(\boldsymbol{\Sigma}_*) \cdot \frac{\beta_n(\mathcal{K})}{\alpha_n^-}, \quad (\text{S.11})$$

where  $\xi(\boldsymbol{\Sigma})$  is defined in Definition 1. In particular, the error for  $\hat{\boldsymbol{\theta}}(\boldsymbol{\Sigma})$  with any input  $\boldsymbol{\Sigma} \in \mathcal{M}(e_0)$  satisfies

$$d_2(\hat{\boldsymbol{\theta}}(\boldsymbol{\Sigma}), \boldsymbol{\theta}_*) \leq \xi(\boldsymbol{\Sigma}) \cdot \frac{\beta_n(\mathcal{M}(e_0))}{\alpha_n^-}. \quad (\text{S.12})$$

**Remark:** Apart from  $\mathcal{K} = \mathcal{M}(e_0)$ , other specific instantiations of this lemma also yield interesting error bounds. For example, setting  $\mathcal{K} = \{\mathbf{I}\}$  gives us the error for the ordinary least squares  $\hat{\boldsymbol{\theta}}_{\text{odn}}$  in (25),

$$\left\| \hat{\boldsymbol{\theta}}_{\text{odn}} - \boldsymbol{\theta}_* \right\|_2 \leq \xi(\mathbf{I}) \cdot \frac{\beta_n(\{\mathbf{I}\})}{\alpha_n^-} = \frac{1}{\sqrt{m}} \cdot \frac{\beta_n(\{\mathbf{I}\})}{\alpha_n^-} \triangleq e_{\text{odn}}. \quad (\text{S.13})$$

If we choose  $\mathcal{K} = \{\boldsymbol{\Sigma}_*\}$ , the error bound corresponds to the oracle estimator  $\hat{\boldsymbol{\theta}}_{\text{orc}}$ ,

$$\left\| \hat{\boldsymbol{\theta}}_{\text{orc}} - \boldsymbol{\theta}_* \right\|_2 \leq \xi(\boldsymbol{\Sigma}_*) \cdot \frac{\beta_n(\{\boldsymbol{\Sigma}_*\})}{\alpha_n^-} = \frac{1}{\sqrt{\text{Tr}(\boldsymbol{\Sigma}_*^{-1})}} \cdot \frac{\beta_n(\{\boldsymbol{\Sigma}_*\})}{\alpha_n^-} \triangleq e_{\text{orc}}. \quad (\text{S.14})$$

*Proof:* We use the shorthand notation  $\hat{\boldsymbol{\theta}}$  for  $\hat{\boldsymbol{\theta}}(\boldsymbol{\Sigma})$ . Since the tuning parameter  $\lambda$  is set to  $\|\boldsymbol{\theta}_*\|$ , the optimality of  $\hat{\boldsymbol{\theta}}$  implies that

$$\begin{aligned}
& \frac{1}{2n} \sum_{i=1}^n \left\| \boldsymbol{\Sigma}^{-\frac{1}{2}} (\mathbf{y}_i - \mathbf{X}_i \hat{\boldsymbol{\theta}}) \right\|_2^2 \leq \frac{1}{2n} \sum_{i=1}^n \left\| \boldsymbol{\Sigma}^{-\frac{1}{2}} (\mathbf{y}_i - \mathbf{X}_i \boldsymbol{\theta}_*) \right\|_2^2 \\
\Rightarrow & \frac{1}{2n} \sum_{i=1}^n \left\| \boldsymbol{\Sigma}^{-\frac{1}{2}} (\mathbf{y}_i - \mathbf{X}_i \boldsymbol{\theta}_*) + \boldsymbol{\Sigma}^{-\frac{1}{2}} \mathbf{X}_i (\boldsymbol{\theta}_* - \hat{\boldsymbol{\theta}}) \right\|_2^2 \leq \frac{1}{2n} \sum_{i=1}^n \left\| \boldsymbol{\Sigma}^{-\frac{1}{2}} (\mathbf{y}_i - \mathbf{X}_i \boldsymbol{\theta}_*) \right\|_2^2 \\
\Rightarrow & \frac{1}{2n} \sum_{i=1}^n \left\| \boldsymbol{\Sigma}^{-\frac{1}{2}} \mathbf{X}_i (\hat{\boldsymbol{\theta}} - \boldsymbol{\theta}_*) \right\|_2^2 + \frac{1}{n} \sum_{i=1}^n (\mathbf{y}_i - \mathbf{X}_i \boldsymbol{\theta}_*)^T \boldsymbol{\Sigma}^{-1} \mathbf{X}_i (\boldsymbol{\theta}_* - \hat{\boldsymbol{\theta}}) \leq 0 \\
\Rightarrow & \frac{1}{n} \sum_{i=1}^n \left\| \boldsymbol{\Sigma}^{-\frac{1}{2}} \mathbf{X}_i (\hat{\boldsymbol{\theta}} - \boldsymbol{\theta}_*) \right\|_2^2 \leq \frac{2}{n} \sum_{i=1}^n \boldsymbol{\eta}_i^T \boldsymbol{\Sigma}^{-1} \mathbf{X}_i (\hat{\boldsymbol{\theta}} - \boldsymbol{\theta}_*) \\
\Rightarrow & \left\| \hat{\boldsymbol{\theta}} - \boldsymbol{\theta}_* \right\|_2 \leq \frac{\frac{2}{n} \sum_{i=1}^n \boldsymbol{\eta}_i^T \boldsymbol{\Sigma}^{-1} \mathbf{X}_i \cdot \frac{\hat{\boldsymbol{\theta}} - \boldsymbol{\theta}_*}{\|\hat{\boldsymbol{\theta}} - \boldsymbol{\theta}_*\|_2}}{\frac{1}{n} \sum_{i=1}^n \left\| \boldsymbol{\Sigma}^{-\frac{1}{2}} \mathbf{X}_i \cdot \frac{\hat{\boldsymbol{\theta}} - \boldsymbol{\theta}_*}{\|\hat{\boldsymbol{\theta}} - \boldsymbol{\theta}_*\|_2} \right\|_2^2}
\end{aligned}$$

Now we try to bound the numerator and the denominator on the right-hand side. Note that  $f(\hat{\boldsymbol{\theta}}) \leq \lambda = f(\boldsymbol{\theta}_*)$ , we thus have  $\frac{\hat{\boldsymbol{\theta}} - \boldsymbol{\theta}_*}{\|\hat{\boldsymbol{\theta}} - \boldsymbol{\theta}_*\|_2} \in \mathcal{C}$  according to the definition of the error spherical cap. Assuming the eigenvalue decomposition  $\boldsymbol{\Sigma} = \sum_{j=1}^m \sigma_j \mathbf{v}_j \mathbf{v}_j^T$ , we further get

$$\begin{aligned}
\frac{1}{n} \sum_{i=1}^n \left\| \boldsymbol{\Sigma}^{-\frac{1}{2}} \mathbf{X}_i \cdot \frac{\hat{\boldsymbol{\theta}} - \boldsymbol{\theta}_*}{\|\hat{\boldsymbol{\theta}} - \boldsymbol{\theta}_*\|_2} \right\|_2^2 & \geq \inf_{\mathbf{u} \in \mathcal{C}} \frac{1}{n} \sum_{i=1}^n \left\| \boldsymbol{\Sigma}^{-\frac{1}{2}} \mathbf{X}_i \mathbf{u} \right\|_2^2 \\
& = \inf_{\mathbf{u} \in \mathcal{C}} \frac{1}{n} \sum_{i=1}^n \mathbf{u}^T \mathbf{X}_i^T \left( \sum_{j=1}^m \sigma_j^{-1} \mathbf{v}_j \mathbf{v}_j^T \right) \mathbf{X}_i \mathbf{u} \\
& = \inf_{\mathbf{u} \in \mathcal{C}} \sum_{j=1}^m \sigma_j^{-1} \cdot \mathbf{u}^T \left( \frac{1}{n} \sum_{i=1}^n \mathbf{X}_i^T \mathbf{v}_j \mathbf{v}_j^T \mathbf{X}_i \right) \mathbf{u} \\
& \geq \left( \sum_{j=1}^m \sigma_j^{-1} \right) \cdot \inf_{\mathbf{v} \in \mathbb{S}^{m-1}} \inf_{\mathbf{u} \in \mathcal{C}} \mathbf{u}^T \left( \frac{1}{n} \sum_{i=1}^n \mathbf{X}_i^T \mathbf{v} \mathbf{v}^T \mathbf{X}_i \right) \mathbf{u} \\
& = \alpha_n^- \cdot \text{Tr}(\boldsymbol{\Sigma}^{-1}) \\
\frac{2}{n} \sum_{i=1}^n \boldsymbol{\eta}_i^T \boldsymbol{\Sigma}^{-1} \mathbf{X}_i \cdot \frac{\hat{\boldsymbol{\theta}} - \boldsymbol{\theta}_*}{\|\hat{\boldsymbol{\theta}} - \boldsymbol{\theta}_*\|_2} & \leq \sup_{\mathbf{u} \in \mathcal{C}} \frac{2}{n} \sum_{i=1}^n \boldsymbol{\eta}_i^T \boldsymbol{\Sigma}^{-1} \mathbf{X}_i \mathbf{u} \\
& = \left\| \boldsymbol{\Sigma}_*^{1/2} \boldsymbol{\Sigma}^{-1} \right\|_F \cdot \sup_{\mathbf{u} \in \mathcal{C}} \frac{2}{n} \sum_{i=1}^n \frac{\boldsymbol{\eta}_i^T \boldsymbol{\Sigma}^{-1} \mathbf{X}_i \mathbf{u}}{\left\| \boldsymbol{\Sigma}_*^{1/2} \boldsymbol{\Sigma}^{-1} \right\|_F} \\
& \leq \left\| \boldsymbol{\Sigma}_*^{1/2} \boldsymbol{\Sigma}^{-1} \right\|_F \cdot \sup_{\boldsymbol{\Sigma} \in \mathcal{M}} \sup_{\mathbf{u} \in \mathcal{C}} \frac{2}{n} \sum_{i=1}^n \frac{\boldsymbol{\eta}_i^T \boldsymbol{\Sigma}^{-1} \mathbf{X}_i \mathbf{u}}{\left\| \boldsymbol{\Sigma}_*^{1/2} \boldsymbol{\Sigma}^{-1} \right\|_F} \\
& = \beta_n \cdot \sqrt{\text{Tr}(\boldsymbol{\Sigma}^{-1} \boldsymbol{\Sigma}_* \boldsymbol{\Sigma}^{-1})}
\end{aligned}$$

Combining the results above, we can get (S.12). ■

Equipped with the deterministic bounds for both  $\boldsymbol{\theta}$ - and  $\boldsymbol{\Sigma}$ -step, we have the following theorem for the whole AltMin procedure.

**Theorem S.3 (deterministic error bound for AltMin)** Define  $\varepsilon_n$ ,  $\rho_n$  and  $e_{\min}$  as

$$\varepsilon_n = \xi(\boldsymbol{\Sigma}_*) \cdot \frac{\beta_n(\mathcal{M}(e_0))}{\alpha_n^-}, \quad \rho_n = 2\varepsilon_n \sqrt{\frac{\alpha_n^+}{\sigma_*^-}}, \quad e_{\min} = \varepsilon_n \cdot \frac{1 + 4\delta_n}{1 - \rho_n}$$

in which  $\delta_n$  is defined in Lemma S.2. Assume that  $e_{\min} < e_0$  and the initialization satisfies both  $f(\hat{\boldsymbol{\theta}}_{(0)}) \leq f(\boldsymbol{\theta}_*)$  and  $\|\hat{\boldsymbol{\theta}}_{(0)} - \boldsymbol{\theta}_*\|_2 \leq e_0$ . Under the conditions of Lemma S.2 and S.3, if  $\rho_n < 1$ , then  $\hat{\boldsymbol{\theta}}_{(T)}$  returned by Algorithm 1 satisfies

$$\|\hat{\boldsymbol{\theta}}_{(T)} - \boldsymbol{\theta}_*\|_2 \leq e_{\min} + \rho_n^T \cdot (e_0 - e_{\min}), \quad (\text{S.15})$$

**Remark:** Note that  $e_{\min}$  is given in a multiplicative form in terms of  $\varepsilon_n$ , which is similar to the bound for the error  $e_{\text{orc}}$  incurred by the oracle estimator. The theorem also reveals the role of  $e_0$ , which is calibrating the quality of initialization. The better the initialization is, the smaller the error  $e_{\min}$  is.

*Proof:* Since the initialization  $\hat{\boldsymbol{\theta}}_{(0)}$  satisfies  $f(\hat{\boldsymbol{\theta}}_{(0)}) \leq f(\boldsymbol{\theta}_*)$  and  $\|\hat{\boldsymbol{\theta}}_{(0)} - \boldsymbol{\theta}_*\|_2 \leq e_0$ , we have  $\hat{\boldsymbol{\Sigma}}_{(1)} \in \mathcal{M}(e_0)$  by Lemma S.2 and S.3, we have for the first iteration of Algorithm 1,

$$\begin{aligned} d_1(\hat{\boldsymbol{\Sigma}}_{(1)}, \boldsymbol{\Sigma}_*) &\leq 4\delta_n + 2\sqrt{\frac{\alpha_n^+}{\sigma_*^-}} \cdot d_2(\hat{\boldsymbol{\theta}}_{(0)}, \boldsymbol{\theta}_*) \\ d_2(\hat{\boldsymbol{\theta}}_{(1)}, \boldsymbol{\theta}_*) &\leq \xi(\hat{\boldsymbol{\Sigma}}_{(1)}) \cdot \frac{\beta_n(\mathcal{M}(e_0))}{\alpha_n^-} = \varepsilon_n \cdot \left(1 + d_1(\hat{\boldsymbol{\Sigma}}_{(1)}, \boldsymbol{\Sigma}_*)\right) \end{aligned}$$

Combining the two inequalities, we obtain the recurrence relation for the error of  $\hat{\boldsymbol{\theta}}_{(1)}$  and  $\hat{\boldsymbol{\theta}}_{(0)}$ ,

$$d_2(\hat{\boldsymbol{\theta}}_{(1)}, \boldsymbol{\theta}_*) \leq \varepsilon_n \cdot \left(1 + 4\delta_n + 2\sqrt{\frac{\alpha_n^+}{\sigma_*^-}} \cdot d_2(\hat{\boldsymbol{\theta}}_{(0)}, \boldsymbol{\theta}_*)\right)$$

As  $\rho_n < 1$  and  $e_{\min} \leq e_0$ , we have  $d_2(\hat{\boldsymbol{\theta}}_{(1)}, \boldsymbol{\theta}_*) \leq e_0$ , thus  $\hat{\boldsymbol{\Sigma}}_{(2)} \in \mathcal{M}(e_0)$ . By induction, we can recursively apply the result to  $t = 2, 3, \dots, T$ ,

$$d_2(\hat{\boldsymbol{\theta}}_{(T)}, \boldsymbol{\theta}_*) \leq q_T, \quad \text{where } q_t = \varepsilon_n (1 + 4\delta_n) + 2\varepsilon_n \sqrt{\frac{\alpha_n^+}{\sigma_*^-}} \cdot q_{t-1} \quad \text{and } q_0 \leq e_0$$

Solving the recurrence of  $r_t$ , we get

$$\begin{aligned} q_T &= \frac{\varepsilon_n (1 + 4\delta_n)}{1 - 2\varepsilon_n \sqrt{\frac{\alpha_n^+}{\sigma_*^-}}} + \left(2\varepsilon_n \sqrt{\frac{\alpha_n^+}{\sigma_*^-}}\right)^T \cdot \left(q_0 - \frac{\varepsilon_n (1 + 4\delta_n)}{1 - 2\varepsilon_n \sqrt{\frac{\alpha_n^+}{\sigma_*^-}}}\right) \\ &= e_{\min} + \rho_n^T \cdot (q_0 - e_{\min}) \\ &\leq e_{\min} + \rho_n^T \cdot (e_0 - e_{\min}), \end{aligned}$$

which completes the proof. ■

### 3 Probabilistic Analysis

In order for the deterministic results to hold nontrivially, we need the conditions stated in Theorem S.3 to be satisfied, and the error  $e_{\min}$  to decay with growing sample size. The proposition below translates those requirements into the desired individual growth rates of  $\alpha_n^-$ ,  $\alpha_n^+$ ,  $\beta_n$ ,  $\gamma_n$  and  $\delta_n$ , which need to hold (with high probability) when the randomness of  $\mathbf{X}$  and  $\tilde{\boldsymbol{\eta}}$  is considered.

**Proposition S.1** *For any fixed  $e_0$  and an initialization with  $f(\hat{\boldsymbol{\theta}}_{(0)}) \leq f(\boldsymbol{\theta}_*)$  and  $\|\hat{\boldsymbol{\theta}}_{(0)} - \boldsymbol{\theta}_*\|_2 \leq e_0$ , the error bound (S.15) holds with large enough  $n$ , and we have  $\lim_{n \rightarrow +\infty} e_{\min} = 0$ , if  $\alpha_n^-$ ,  $\alpha_n^+$ ,  $\delta_n$ ,  $\gamma_n$  and  $\beta_n(\mathcal{M}(e_0))$  satisfy the following conditions,*

- (i) *The smallest and the largest URE:  $\alpha_n^- = \Theta(1)$  and  $\alpha_n^+ = \Theta(1)$*
- (ii) *The rate of convergence for  $\|\frac{1}{n} \sum_{i=1}^n \tilde{\boldsymbol{\eta}}_i \tilde{\boldsymbol{\eta}}_i^T - \mathbf{I}\|_2$ :  $\delta_n = o(1)$*

(iii) The type-I noise-design interaction strength:  $\gamma_n = o(\delta_n^{1/2})$

(iv) The type-II noise-design interaction strength:  $\beta_n(\mathcal{M}(e_0)) = o(1)$

*Proof:* Since  $\alpha_n^- = \Theta(1)$  and  $\beta_n(\mathcal{M}(e_0)) = o(1)$ , we have  $\lim_{n \rightarrow +\infty} \varepsilon_n = \lim_{n \rightarrow +\infty} \xi(\Sigma_*) \cdot \frac{\beta_n(\mathcal{M}(e_0))}{\alpha_n^-} = 0$ . As (ii) holds, it follows from that  $\delta_n \leq \frac{1}{4}$  when  $n$  is large. Due to (iii), the condition  $\frac{\delta_n \alpha_n^-}{\gamma_n^2} \geq \frac{\sigma_*^+}{4\sigma_*}$  is true for sufficiently large  $n$ . Given that  $\varepsilon_n = o(1)$  and  $\alpha_n^+ = \Theta(1)$ , we have  $\rho_n = o(1)$ . With  $\rho_n = o(1)$  and  $\delta_n = o(1)$ , it is easy to see that  $e_{\min} \leq e_0$  for large enough  $n$  and  $\lim_{n \rightarrow +\infty} \frac{e_{\min}}{\varepsilon_n} = 1$ , thereby  $\lim_{n \rightarrow +\infty} e_{\min} = 0$ . ■

For the rest of the section, our goal is to show the high-probability non-asymptotic bounds for  $\alpha_n^-$ ,  $\alpha_n^+$ ,  $\delta_n$ ,  $\gamma_n$  and  $\beta_n$ . As a reminder, the stochastic assumptions given in the main paper are listed below.

(A1) The designs  $\mathbf{X}_1, \dots, \mathbf{X}_n$  are i.i.d. copies of a sub-Gaussian  $\mathbf{X}$  with parameter  $\kappa$ ,  $\mu^-$  and  $\mu^+$ .

(A2) The isotropic noises  $\tilde{\eta}_1, \dots, \tilde{\eta}_n$  are i.i.d. copies of a sub-Gaussian  $\tilde{\eta}$  with parameter  $\tau$ .

### 3.1 Bounding $\alpha_n^-$ and $\alpha_n^+$

The lemma below justifies the claim of the condition (i).

**Lemma S.4** *Under the assumption (A1), if the sample size  $n \geq C_0 \max \left\{ \kappa^4 \left( \frac{\mu^+}{\mu^-} \right)^2, 1 \right\} \cdot \max \{w^2(\mathcal{C}), m\}$ , with probability at least  $1 - 2 \exp(-C_1 \max \{w^2(\mathcal{C}), m\})$ , the smallest and the largest URE satisfy*

$$\frac{1}{2}\mu^- \leq \alpha_n^- \leq \alpha_n^+ \leq \frac{3}{2}\mu^+, \quad (\text{S.16})$$

where  $w(\mathcal{C})$  is the Gaussian width of the error spherical cap.

*Proof:* First we have

$$\begin{aligned} \alpha_n^- &= \inf_{\mathbf{v} \in \mathbb{S}^{m-1}} \inf_{\mathbf{u} \in \mathcal{C}} \mathbf{u}^T \left( \frac{1}{n} \sum_{i=1}^n \mathbf{X}_i^T \mathbf{v} \mathbf{v}^T \mathbf{X}_i \right) \mathbf{u} \\ &\geq \inf_{\mathbf{v} \in \mathbb{S}^{m-1}} \inf_{\mathbf{u} \in \mathcal{C}} \mathbf{u}^T (\mathbb{E} [\mathbf{X}^T \mathbf{v} \mathbf{v}^T \mathbf{X}]) \mathbf{u} + \inf_{\mathbf{v} \in \mathbb{S}^{m-1}} \inf_{\mathbf{u} \in \mathcal{C}} \mathbf{u}^T \left( \frac{1}{n} \sum_{i=1}^n \mathbf{X}_i^T \mathbf{v} \mathbf{v}^T \mathbf{X}_i - \mathbb{E} [\mathbf{X}^T \mathbf{v} \mathbf{v}^T \mathbf{X}] \right) \mathbf{u} \\ &\geq \inf_{\mathbf{v} \in \mathbb{S}^{m-1}} \inf_{\mathbf{u} \in \mathcal{C}} \mathbf{u}^T (\mathbb{E} [\mathbf{X}^T \mathbf{v} \mathbf{v}^T \mathbf{X}]) \mathbf{u} - \sup_{\mathbf{v} \in \mathbb{S}^{m-1}} \sup_{\mathbf{u} \in \mathcal{C}} \left| \frac{1}{n} \sum_{i=1}^n (\mathbf{u}^T \mathbf{X}_i^T \mathbf{v})^2 - \mathbb{E}(\mathbf{u}^T \mathbf{X}^T \mathbf{v})^2 \right| \\ &\geq \mu^- - \sup_{\mathbf{v} \in \mathbb{S}^{m-1}} \sup_{\mathbf{u} \in \mathcal{C}} \left| \frac{1}{n} \sum_{i=1}^n (\mathbf{u}^T \mathbf{X}_i^T \mathbf{v})^2 - \mathbb{E}(\mathbf{u}^T \mathbf{X}^T \mathbf{v})^2 \right| \\ \alpha_n^+ &= \sup_{\mathbf{v} \in \mathbb{S}^{m-1}} \sup_{\mathbf{u} \in \mathcal{C}} \mathbf{u}^T \left( \frac{1}{n} \sum_{i=1}^n \mathbf{X}_i^T \mathbf{v} \mathbf{v}^T \mathbf{X}_i \right) \mathbf{u} \\ &\leq \sup_{\mathbf{v} \in \mathbb{S}^{m-1}} \sup_{\mathbf{u} \in \mathcal{C}} \mathbf{u}^T (\mathbb{E} [\mathbf{X}^T \mathbf{v} \mathbf{v}^T \mathbf{X}]) \mathbf{u} + \sup_{\mathbf{v} \in \mathbb{S}^{m-1}} \sup_{\mathbf{u} \in \mathcal{C}} \mathbf{u}^T \left( \frac{1}{n} \sum_{i=1}^n \mathbf{X}_i^T \mathbf{v} \mathbf{v}^T \mathbf{X}_i - \mathbb{E} [\mathbf{X}^T \mathbf{v} \mathbf{v}^T \mathbf{X}] \right) \mathbf{u} \\ &\leq \sup_{\mathbf{v} \in \mathbb{S}^{m-1}} \sup_{\mathbf{u} \in \mathcal{C}} \mathbf{u}^T (\mathbb{E} [\mathbf{X}^T \mathbf{v} \mathbf{v}^T \mathbf{X}]) \mathbf{u} + \sup_{\mathbf{v} \in \mathbb{S}^{m-1}} \sup_{\mathbf{u} \in \mathcal{C}} \left| \frac{1}{n} \sum_{i=1}^n (\mathbf{u}^T \mathbf{X}_i^T \mathbf{v})^2 - \mathbb{E}(\mathbf{u}^T \mathbf{X}^T \mathbf{v})^2 \right| \\ &\leq \mu^+ + \sup_{\mathbf{v} \in \mathbb{S}^{m-1}} \sup_{\mathbf{u} \in \mathcal{C}} \left| \frac{1}{n} \sum_{i=1}^n (\mathbf{u}^T \mathbf{X}_i^T \mathbf{v})^2 - \mathbb{E}(\mathbf{u}^T \mathbf{X}^T \mathbf{v})^2 \right| \end{aligned}$$



Now the goal is to bound  $\sup_{\mathbf{v} \in \mathbb{S}^{m-1}} \sup_{\mathbf{u} \in \mathcal{C}} \left| \frac{1}{n} \sum_{i=1}^n (\mathbf{u}^T \mathbf{X}_i^T \mathbf{v})^2 - \mathbb{E}(\mathbf{u}^T \mathbf{X}^T \mathbf{v})^2 \right|$ . In order to apply Corollary S.1, we let  $\mathcal{A} = \mathbb{S}^{m-1} \times \mathcal{C} \subset \mathbb{R}^{m+p}$ ,  $\mathbf{a} = (\mathbf{v}, \mathbf{u})$ , and the function class  $\mathcal{F} = \{f_{\mathbf{a}} = \mathbf{u}^T \mathbf{X}^T \mathbf{v}\}_{\mathbf{a} \in \mathcal{A}}$ . We then verify the conditions required by Corollary S.1 for  $\mathcal{F}$  and  $\mathcal{A}$ .

$$\begin{aligned}
\sup_{f \in \mathcal{F}} \|f\|_{\psi_2} &= \sup_{\mathbf{v} \in \mathbb{S}^{m-1}} \sup_{\mathbf{u} \in \mathcal{C}} \|\mathbf{u}^T \mathbf{X}^T \mathbf{v}\|_{\psi_2} \\
&= \sup_{\mathbf{v} \in \mathbb{S}^{m-1}} \sup_{\mathbf{u} \in \mathcal{C}} \left\| \mathbf{u}^T \Gamma_{\mathbf{v}}^{1/2} \Gamma_{\mathbf{v}}^{-1/2} \mathbf{X}^T \mathbf{v} \right\|_{\psi_2} \\
&\leq \kappa \cdot \sup_{\mathbf{v} \in \mathbb{S}^{m-1}} \sup_{\mathbf{u} \in \mathcal{C}} \left\| \Gamma_{\mathbf{v}}^{1/2} \mathbf{u} \right\|_2 \\
&\leq \kappa \cdot \sup_{\mathbf{v} \in \mathbb{S}^{m-1}} \left\| \Gamma_{\mathbf{v}}^{1/2} \right\|_2 \leq \kappa \sqrt{\mu^+} \quad \implies \quad R_{\mathcal{F}} = \kappa \sqrt{\mu^+}
\end{aligned}$$

$$\begin{aligned}
\forall \mathbf{a}, \mathbf{a}' \in \mathcal{A}, \quad \|f_{\mathbf{a}} - f_{\mathbf{a}'}\|_{\psi_2} &= \|\mathbf{u}^T \mathbf{X}^T \mathbf{v} - \mathbf{u}'^T \mathbf{X}^T \mathbf{v}'\|_{\psi_2} \\
&= \|(\mathbf{u} - \mathbf{u}')^T \mathbf{X}^T \mathbf{v} + \mathbf{u}'^T \mathbf{X}^T (\mathbf{v} - \mathbf{v}')\|_{\psi_2} \\
&\leq \|\mathbf{u} - \mathbf{u}'\|_2 \left\| \frac{(\mathbf{u} - \mathbf{u}')^T}{\|\mathbf{u} - \mathbf{u}'\|_2} \mathbf{X}^T \mathbf{v} \right\|_{\psi_2} + \|\mathbf{v} - \mathbf{v}'\|_2 \left\| \mathbf{u}'^T \mathbf{X}^T \frac{(\mathbf{v} - \mathbf{v}')}{\|\mathbf{v} - \mathbf{v}'\|_2} \right\|_{\psi_2} \\
&\leq \kappa \sqrt{\mu^+} (\|\mathbf{u} - \mathbf{u}'\|_2 + \|\mathbf{v} - \mathbf{v}'\|_2) \\
&\leq \sqrt{2} \kappa \sqrt{\mu^+} \cdot \sqrt{\|\mathbf{u} - \mathbf{u}'\|_2^2 + \|\mathbf{v} - \mathbf{v}'\|_2^2} \\
&= \sqrt{2} \kappa \sqrt{\mu^+} \|\mathbf{a} - \mathbf{a}'\|_2 \quad \implies \quad K_{\mathcal{F}} = \sqrt{2} \kappa \sqrt{\mu^+}
\end{aligned}$$

It follows from Corollary S.1 that if  $n \geq c_0 w^2(\mathcal{A})$ , the following result holds with probability at least  $1 - 2 \exp(-c_1 w^2(\mathcal{A}))$ ,

$$\sup_{\mathbf{v} \in \mathbb{S}^{m-1}} \sup_{\mathbf{u} \in \mathcal{C}} \left| \frac{1}{n} \sum_{i=1}^n (\mathbf{u}^T \mathbf{X}_i^T \mathbf{v})^2 - \mathbb{E}(\mathbf{u}^T \mathbf{X}^T \mathbf{v})^2 \right| \leq c_2 \cdot \frac{\kappa^2 \mu^+ \cdot w(\mathcal{A})}{\sqrt{n}} \quad (\text{S.17})$$

If  $n$  further satisfies  $n \geq 4c_2^2 \kappa^4 \left(\frac{\mu^+}{\mu^-}\right)^2 w^2(\mathcal{A})$ , then

$$\begin{aligned}
\sup_{\mathbf{v} \in \mathbb{S}^{m-1}} \sup_{\mathbf{u} \in \mathcal{C}} \left| \frac{1}{n} \sum_{i=1}^n (\mathbf{u}^T \mathbf{X}_i^T \mathbf{v})^2 - \mathbb{E}(\mathbf{u}^T \mathbf{X}^T \mathbf{v})^2 \right| &\leq \frac{1}{2} \mu^- \\
\implies \quad \alpha_n^- &\geq \mu^- - \frac{1}{2} \mu^- = \frac{1}{2} \mu^-, \quad \alpha_n^+ \leq \mu^+ + \frac{1}{2} \mu^- \leq \frac{3}{2} \mu^+
\end{aligned}$$

Finally we note that

$$\begin{aligned}
w(\mathcal{A}) &= \mathbb{E} \left[ \sup_{\mathbf{a} \in \mathcal{A}} \langle \mathbf{a}, \mathbf{g}_{m+p} \rangle \right] = \mathbb{E} \left[ \sup_{\mathbf{u} \in \mathbb{S}^{m-1}} \langle \mathbf{u}, \mathbf{g}_m \rangle + \sup_{\mathbf{v} \in \mathcal{C}} \langle \mathbf{v}, \mathbf{g}_p \rangle \right] \\
&= \mathbb{E} [\|\mathbf{g}_m\|_2] + w(\mathcal{C}) = \Theta(\sqrt{m}) + w(\mathcal{C})
\end{aligned}$$

By renaming the constants, we finish the proof.  $\blacksquare$

### 3.2 Bounding $\delta_n$

The condition (ii) is simply implied by the following bound for the convergence of sample covariance matrix, which is a direct result of Lemma 5.36 and Theorem 5.39 in [5].

**Proposition S.2** *Under the assumption (A2), there exist absolute constants  $C_0$ ,  $C_1$  and  $C_2$  such that if  $n \geq C_0 \tau^4 m$ , the following inequality holds with probability at least  $1 - 2 \exp(-C_1 m)$ ,*

$$\left\| \frac{1}{n} \sum_{i=1}^n \tilde{\boldsymbol{\eta}}_i \tilde{\boldsymbol{\eta}}_i^T - \mathbf{I} \right\|_2 \leq C_2 \tau^2 \sqrt{\frac{m}{n}} \triangleq \delta_n \quad (\text{S.18})$$

### 3.3 Bounding $\gamma_n$

Next we show that the rate of  $\gamma_n$  also has a  $\frac{1}{\sqrt{n}}$ -dependence as  $\delta_n$ , thus implying that  $\gamma_n = o(\delta_n^{1/2})$  in the condition (iii).

**Lemma S.5** *Under the assumptions (A1) and (A2), if  $n \geq C_0 m$ , the following inequality holds with probability at least  $1 - 2 \exp(-C_1 m)$  for the type-I NDI strength  $\gamma_n$ ,*

$$\gamma_n \leq C_2 \cdot \frac{\kappa \tau \sqrt{\mu^+} (\sqrt{m} + w(\mathcal{C}))}{\sqrt{n}}. \quad (\text{S.19})$$

*Proof:* First we have

$$\begin{aligned} \gamma_n &= \sup_{\mathbf{u} \in \mathcal{C}} \left\| \frac{2}{n} \sum_{i=1}^n \mathbf{X}_i \mathbf{u} \tilde{\eta}_i^T \right\|_2 = 2 \sup_{\mathbf{u} \in \mathcal{C}} \sup_{\mathbf{v} \in \mathbb{S}^{m-1}} \sup_{\mathbf{b} \in \mathbb{S}^{m-1}} \frac{1}{n} \sum_{i=1}^n (\mathbf{v}^T \mathbf{X}_i \mathbf{u}) (\tilde{\eta}_i^T \mathbf{b}) \\ &= 2 \sup_{\mathbf{u} \in \mathcal{C}} \sup_{\mathbf{v} \in \mathbb{S}^{m-1}} \sup_{\mathbf{b} \in \mathbb{S}^{m-1}} \left| \frac{1}{n} \sum_{i=1}^n (\mathbf{v}^T \mathbf{X}_i \mathbf{u}) (\tilde{\eta}_i^T \mathbf{b}) - \mathbb{E} [\mathbf{v}^T \mathbf{X} \mathbf{u} \tilde{\eta}^T \mathbf{b}] \right| \end{aligned}$$

Next we use Theorem S.2 to bound the stochastic process above. Let  $\mathcal{A} = \mathbb{S}^{m-1} \times \mathcal{C} \subset \mathbb{R}^{m+p}$ ,  $\mathbf{a} = (\mathbf{v}, \mathbf{u})$  and  $\mathcal{B} = \mathbb{S}^{m-1}$ . Construct  $\mathcal{F} = \{f_{\mathbf{a}} = \mathbf{v}^T \mathbf{X} \mathbf{u}\}_{\mathbf{a} \in \mathcal{A}}$  and  $\mathcal{H} = \{h_{\mathbf{b}} = \tilde{\eta}^T \mathbf{b}\}_{\mathbf{b} \in \mathcal{B}}$ . We start by verifying the assumptions. Note that

$$\begin{aligned} \sup_{f \in \mathcal{F}} \|f\|_{\psi_2} &= \sup_{\mathbf{u} \in \mathcal{C}} \sup_{\mathbf{v} \in \mathbb{S}^{m-1}} \|\mathbf{u}^T \mathbf{X}^T \mathbf{v}\|_{\psi_2} \\ &\leq \sup_{\mathbf{u} \in \mathcal{C}} \sup_{\mathbf{v} \in \mathbb{S}^{m-1}} \|\mathbf{u}^T \mathbf{X}^T \mathbf{v}\|_{\psi_2} \\ &= \sup_{\mathbf{u} \in \mathcal{C}} \sup_{\mathbf{v} \in \mathbb{S}^{m-1}} \|\mathbf{u}^T \mathbf{\Gamma}_{\mathbf{v}}^{1/2} \mathbf{\Gamma}_{\mathbf{v}}^{-1/2} \mathbf{X}^T \mathbf{v}\|_{\psi_2} \\ &\leq \sup_{\mathbf{u} \in \mathcal{C}} \sup_{\mathbf{v} \in \mathbb{S}^{m-1}} \kappa \|\mathbf{\Gamma}_{\mathbf{v}}^{1/2} \mathbf{u}\|_2 \\ &\leq \kappa \sqrt{\mu^+} \implies R_{\mathcal{F}} = \kappa \sqrt{\mu^+} \\ \sup_{h \in \mathcal{H}} \|h\|_{\psi_2} &= \sup_{\mathbf{b} \in \mathbb{S}^{m-1}} \|\tilde{\eta}^T \mathbf{b}\|_{\psi_2} \leq \tau \implies R_{\mathcal{H}} = \tau \end{aligned}$$

Similar to the proof for Lemma S.4, we have

$$\begin{aligned} \forall \mathbf{a}, \mathbf{a}' \in \mathcal{A}, \|f_{\mathbf{a}} - f_{\mathbf{a}'}\|_{\psi_2} &= \left\| \mathbf{v}^T \mathbf{X}^T \mathbf{\Sigma}_*^{-1/2} \mathbf{u} - \mathbf{v}'^T \mathbf{X}^T \mathbf{\Sigma}_*^{-1/2} \mathbf{u}' \right\|_{\psi_2} \\ &\leq \left\| (\mathbf{v} - \mathbf{v}')^T \mathbf{X}^T \mathbf{u} + \mathbf{v}'^T \mathbf{X}^T (\mathbf{u} - \mathbf{u}') \right\|_{\psi_2} \\ &\leq \|\mathbf{v} - \mathbf{v}'\|_2 \left\| \frac{(\mathbf{v} - \mathbf{v}')^T}{\|\mathbf{v} - \mathbf{v}'\|_2} \mathbf{X}^T \mathbf{u} \right\|_{\psi_2} + \|\mathbf{u} - \mathbf{u}'\|_2 \left\| \mathbf{v}'^T \mathbf{X}^T \frac{(\mathbf{u} - \mathbf{u}')}{\|\mathbf{u} - \mathbf{u}'\|_2} \right\|_{\psi_2} \\ &\leq \kappa \sqrt{\mu^+} (\|\mathbf{v} - \mathbf{v}'\|_2 + \|\mathbf{u} - \mathbf{u}'\|_2) \\ &\leq \sqrt{2} \kappa \sqrt{\mu^+} \cdot \sqrt{\|\mathbf{v} - \mathbf{v}'\|_2^2 + \|\mathbf{u} - \mathbf{u}'\|_2^2} \\ &= \sqrt{2} \kappa \sqrt{\mu^+} \|\mathbf{a} - \mathbf{a}'\|_2 \implies K_{\mathcal{F}} = \sqrt{2} \kappa \sqrt{\mu^+} \end{aligned}$$

$$\forall \mathbf{b}, \mathbf{b}' \in \mathcal{B}, \|h_{\mathbf{b}} - h_{\mathbf{b}'}\|_{\psi_2} = \|\tilde{\eta}^T (\mathbf{b} - \mathbf{b}')\|_{\psi_2} \leq \tau \|\mathbf{b} - \mathbf{b}'\|_2 \implies K_{\mathcal{H}} = \tau$$

By invoking Theorem S.2 and noting that  $w(\mathbb{S}^{m-1}) = \Theta(\sqrt{m})$ ,  $w(\mathcal{A}) = w(\mathbb{S}^{m-1}) + w(\mathcal{C}) \geq w(\mathcal{B})$ , if  $n \geq c_0 m$ , we get

$$\begin{aligned} \gamma_n &\leq 2 \sup_{\mathbf{u} \in \mathcal{C}} \sup_{\mathbf{v} \in \mathbb{S}^{m-1}} \sup_{\mathbf{b} \in \mathbb{S}^{m-1}} \left| \frac{1}{n} \sum_{i=1}^n (\mathbf{v}^T \mathbf{X}_i \mathbf{u}) (\tilde{\eta}_i^T \mathbf{b}) - \mathbb{E} [\mathbf{v}^T \mathbf{X} \mathbf{u} \tilde{\eta}^T \mathbf{b}] \right| \\ &\leq c_2 \cdot \kappa \tau \sqrt{\mu^+} \cdot \frac{\sqrt{m} + w(\mathcal{C})}{\sqrt{n}} \end{aligned}$$

with probability at least  $1 - 2 \exp(-c_1 m)$ . The proof is completed by renaming the constants.  $\blacksquare$

### 3.4 Bounding $\beta_n(\mathcal{M}(e_0))$

Lastly we verify the condition (iv). Given the statement of Theorem S.3, we first bound  $\beta_n(\mathcal{M}(e_0))$  for  $e_0 = +\infty$ , which allows arbitrary initializations of AltMin.

**Lemma S.6** *Suppose that the conditions of Lemma S.2 are satisfied with probability  $1 - \epsilon$  when  $n \geq n_0$ . Under the assumptions (A1) and (A2), if sample size  $n \geq \max\{n_0, C_0\tau^4 m\}$ , the type-II NDI strength for  $\mathcal{M}(e_0)$  with  $e_0 = +\infty$  satisfies,*

$$\beta_n(\mathcal{M}(e_0)) \leq C_3 \cdot \frac{\kappa \sqrt{\mu^+} (m + w(\mathcal{C}))}{\sqrt{n}}, \quad (\text{S.20})$$

with probability at least  $1 - \epsilon - C_2 \exp(-C_1 m)$ .

*Proof:* When the conditions of Lemma S.2 is satisfied, the invertibility holds for all  $\Sigma \in \mathcal{M}$ . using the relation  $\boldsymbol{\eta} = \Sigma_*^{1/2} \tilde{\boldsymbol{\eta}}$ , we have

$$\begin{aligned} \beta_n &= \sup_{\Sigma \in \mathcal{M}} \sup_{\mathbf{u} \in \mathcal{C}} \frac{2}{n} \sum_{i=1}^n \frac{\boldsymbol{\eta}_i^T \Sigma^{-1} \mathbf{X}_i \mathbf{u}}{\|\Sigma_*^{1/2} \Sigma^{-1}\|_F} \\ &= \sup_{\Sigma \in \mathcal{M}} \sup_{\mathbf{u} \in \mathcal{C}} \frac{2}{n} \sum_{i=1}^n \frac{\tilde{\boldsymbol{\eta}}_i^T \Sigma_*^{1/2} \Sigma^{-1} \mathbf{X}_i \mathbf{u}}{\|\Sigma_*^{1/2} \Sigma^{-1}\|_F} \\ &\leq \underbrace{\sup_{\Lambda \in \mathbb{S}^{m \times m-1}} \sup_{\mathbf{u} \in \mathcal{C}} \frac{2}{n} \sum_{i=1}^n \tilde{\boldsymbol{\eta}}_i^T \Lambda \mathbf{X}_i \mathbf{u}}_{\nu_n} \end{aligned}$$

Therefore we just need to bound  $\nu_n$ . Since the design and noise are independent, we will consider their randomness in a sequential fashion. The proof proceeds in two steps. First we show that the noises  $\tilde{\boldsymbol{\eta}}_1, \tilde{\boldsymbol{\eta}}_2, \dots, \tilde{\boldsymbol{\eta}}_n$  will behave “well” with high probability. By the word “well”, we mean that the following event is true,

$$\mathcal{E} = \left\{ \{\tilde{\boldsymbol{\eta}}_i\} \mid \sup_{\Lambda \in \mathbb{S}^{m \times m-1}} \frac{1}{n} \sum_{i=1}^n \|\Lambda^T \tilde{\boldsymbol{\eta}}_i\|_2^2 \leq 2 \right\}. \quad (\text{S.21})$$

Denoting the columns of  $\Lambda$  by  $\boldsymbol{\lambda}_1, \boldsymbol{\lambda}_2, \dots, \boldsymbol{\lambda}_m$ , we have

$$\begin{aligned} \sup_{\Lambda \in \mathbb{S}^{m \times m-1}} \frac{1}{n} \sum_{i=1}^n \|\Lambda^T \tilde{\boldsymbol{\eta}}_i\|_2^2 &= \sup_{\Lambda \in \mathbb{S}^{m \times m-1}} \frac{1}{n} \sum_{i=1}^n \text{Tr}(\Lambda^T \tilde{\boldsymbol{\eta}}_i \tilde{\boldsymbol{\eta}}_i^T \Lambda) \\ &= \sup_{\Lambda \in \mathbb{S}^{m \times m-1}} \sum_{j=1}^m \boldsymbol{\lambda}_j^T \left( \frac{1}{n} \sum_{i=1}^n \tilde{\boldsymbol{\eta}}_i \tilde{\boldsymbol{\eta}}_i^T \right) \boldsymbol{\lambda}_j \\ &= \sup_{\Lambda \in \mathbb{S}^{m \times m-1}} \sum_{j=1}^m \|\boldsymbol{\lambda}_j\|_2^2 \cdot \left\| \frac{1}{n} \sum_{i=1}^n \tilde{\boldsymbol{\eta}}_i \tilde{\boldsymbol{\eta}}_i^T \right\|_2 \\ &= \left\| \frac{1}{n} \sum_{i=1}^n \tilde{\boldsymbol{\eta}}_i \tilde{\boldsymbol{\eta}}_i^T \right\|_2 \end{aligned}$$

By Proposition S.2, if  $n \geq c_0 \tau^4 m$ , we have

$$\left\| \frac{1}{n} \sum_{i=1}^n \tilde{\boldsymbol{\eta}}_i \tilde{\boldsymbol{\eta}}_i^T \right\|_2 \leq 1 + \left\| \frac{1}{n} \sum_{i=1}^n \tilde{\boldsymbol{\eta}}_i \tilde{\boldsymbol{\eta}}_i^T - \mathbf{I} \right\|_2 \leq 2$$

with probability at least  $1 - 2 \exp(-c_1 m)$ .

Next we consider the randomness of  $\mathbf{X}_i$  given that  $\tilde{\boldsymbol{\eta}}_i$ 's are fixed and  $\mathcal{E}$  is true. Construct the stochastic process  $\left\{ Z_{\mathbf{t}} = \frac{1}{\sqrt{n}} \sum_{i=1}^n \tilde{\boldsymbol{\eta}}_i^T \Lambda \mathbf{X}_i \mathbf{u} \right\}_{\mathbf{t} \in \mathcal{T}}$ , where  $\mathcal{T} = \mathbb{S}^{m \times m-1} \times \mathcal{C} \subset \mathbb{R}^{m \times m+p}$  and  $\mathbf{t} = (\text{vec}(\Lambda), \mathbf{u})$ . Note that

$$\forall \mathbf{t}, \mathbf{t}' \in \mathcal{T}, \quad \|\mathbf{t} - \mathbf{t}'\|_2 = \sqrt{\|\Lambda - \Lambda'\|_F^2 + \|\mathbf{u} - \mathbf{u}'\|_2^2} \leq 2\sqrt{2} \implies \text{diam}(\mathcal{T}) \leq 2\sqrt{2}$$

In order to apply Theorem S.1 to  $\{Z_t\}$ , we first verify the required condition.

$$\begin{aligned}
\forall \mathbf{t}, \mathbf{t}' \in \mathcal{T}, \quad \|Z_t - Z_{t'}\|_{\psi_2} &= \left\| \frac{1}{\sqrt{n}} \sum_{i=1}^n \tilde{\eta}_i^T \Lambda \mathbf{X}_i \mathbf{u} - \frac{1}{\sqrt{n}} \sum_{i=1}^n \tilde{\eta}_i^T \Lambda' \mathbf{X}_i \mathbf{u}' \right\|_{\psi_2} \\
&\leq \left\| \frac{1}{\sqrt{n}} \sum_{i=1}^n \tilde{\eta}_i^T (\Lambda - \Lambda') \mathbf{X}_i \mathbf{u} \right\|_{\psi_2} + \left\| \frac{1}{\sqrt{n}} \sum_{i=1}^n \tilde{\eta}_i^T \Lambda' \mathbf{X}_i (\mathbf{u} - \mathbf{u}') \right\|_{\psi_2} \\
&\stackrel{(a)}{\leq} c_2 \sqrt{\frac{1}{n} \sum_{i=1}^n \|(\Lambda - \Lambda')^T \tilde{\eta}_i\|_2^2} \cdot \sup_{\mathbf{v} \in \mathbb{S}^{m-1}} \|\mathbf{v}^T \mathbf{X} \mathbf{u}\|_{\psi_2} \\
&\quad + c_2 \sqrt{\frac{1}{n} \sum_{i=1}^n \|\Lambda'^T \tilde{\eta}_i\|_2^2} \cdot \|\mathbf{u} - \mathbf{u}'\|_2 \cdot \sup_{\mathbf{v} \in \mathbb{S}^{m-1}} \left\| \mathbf{v}^T \mathbf{X} \frac{\mathbf{u} - \mathbf{u}'}{\|\mathbf{u} - \mathbf{u}'\|_2} \right\|_{\psi_2} \\
&\leq \sqrt{2} c_2 \kappa \sqrt{\mu^+} (\|\Lambda - \Lambda'\|_F + \|\mathbf{u} - \mathbf{u}'\|_2) \\
&\leq 2c_2 \kappa \sqrt{\mu^+} \left\| \begin{bmatrix} \text{vec}(\Lambda) \\ \mathbf{u} \end{bmatrix} - \begin{bmatrix} \text{vec}(\Lambda') \\ \mathbf{u}' \end{bmatrix} \right\|_2 \implies K = 2c_2 \kappa \sqrt{\mu^+},
\end{aligned}$$

where step (a) follows from Lemma S.1. By Theorem S.1, we have for fixed  $\{\tilde{\eta}_i\}$  under event  $\mathcal{E}$ ,

$$\nu_n = \frac{2}{\sqrt{n}} \cdot \sup_{\mathbf{t} \in \mathcal{T}} Z_t = \frac{1}{\sqrt{n}} \cdot \sup_{\mathbf{t}, \mathbf{t}' \in \mathcal{T}} |Z_t - Z_{t'}| \leq c_3 \cdot \frac{\kappa \sqrt{\mu^+} \cdot w(\mathcal{T})}{\sqrt{n}}$$

with probability at least  $1 - c_4 \exp\left(-\frac{w^2(\mathcal{T})}{\text{diam}^2(\mathcal{T})}\right) \geq 1 - c_4 \exp\left(-\frac{w^2(\mathcal{T})}{8}\right)$ . Now we combine the randomness of  $\mathbf{X}_i$  and  $\tilde{\eta}_i$ , and get

$$\begin{aligned}
&\mathbb{P}_{\mathbf{X}, \tilde{\eta}} \left( \nu_n \leq c_3 \cdot \frac{\kappa \sqrt{\mu^+} \cdot w(\mathcal{T})}{\sqrt{n}} \right) \\
&= \int \mathbb{P}_{\mathbf{X}} \left( \nu_n \leq c_3 \cdot \frac{\kappa \sqrt{\mu^+} \cdot w(\mathcal{T})}{\sqrt{n}} \mid \{\tilde{\eta}_i\} \right) p(\tilde{\eta}_1, \dots, \tilde{\eta}_n) d\tilde{\eta}_1 \dots d\tilde{\eta}_n \\
&\geq \int_{\mathcal{E}} \mathbb{P}_{\mathbf{X}} \left( \nu_n \leq c_3 \cdot \frac{\kappa \sqrt{\mu^+} \cdot w(\mathcal{T})}{\sqrt{n}} \mid \{\tilde{\eta}_i\} \right) p(\tilde{\eta}_1, \dots, \tilde{\eta}_n) d\tilde{\eta}_1 \dots d\tilde{\eta}_n \\
&\geq \left( 1 - c_4 \exp\left(-\frac{w^2(\mathcal{T})}{8}\right) \right) \cdot \mathbb{P}(\mathcal{E}) \\
&\geq \left( 1 - c_4 \exp\left(-\frac{w^2(\mathcal{T})}{8}\right) \right) (1 - 2 \exp(-c_1 m)) \\
&\geq 1 - 2 \exp(-c_1 m) - c_4 \exp\left(-\frac{w^2(\mathcal{T})}{8}\right) \\
&\geq 1 - c_5 \exp(-c_6 m),
\end{aligned}$$

where the last step follows from  $w(\mathcal{T}) = w(\mathbb{S}^{m \times m-1} \times \mathcal{C}) = w(\mathbb{S}^{m \times m-1}) + w(\mathcal{C}) = \Theta(m) + w(\mathcal{C})$ . Since the invertibility for  $\mathcal{M}$  is implied by the conditions of Lemma S.2, we have that if  $n \geq \max\{n_0, C_0 \tau^4 m\}$ ,

$$\beta_n \leq c_7 \cdot \frac{\kappa \sqrt{\mu^+} (m + w(\mathcal{C}))}{\sqrt{n}}$$

with probability at least  $1 - \epsilon - c_5 \exp(-c_6 m)$ . Finally we complete the proof by renaming the constants.  $\blacksquare$

The proof of Lemma S.6 suggests that  $\beta_n$  for any singleton  $\mathcal{K}$  satisfies

$$\beta_n(\mathcal{K}) \leq C'_3 \cdot \frac{\kappa \sqrt{\mu^+} \cdot w(\mathcal{C})}{\sqrt{n}}, \quad (\text{S.22})$$

with probability  $1 - C'_2 \exp(-C'_1 m)$  if  $n \geq C'_0 \tau^4 m$ . Combined with Lemma S.3 and S.4, this immediately implies the error of both ordinary and oracle constrained least squares

$$e_{\text{odn}} = \frac{C' \kappa \sqrt{\mu^+}}{\mu^- \sqrt{m}} \cdot \frac{w(\mathcal{C})}{\sqrt{n}} \quad (\text{S.23})$$

$$e_{\text{orc}} = \frac{C' \kappa \sqrt{\mu^+}}{\mu^- \sqrt{\text{Tr}(\Sigma_*^{-1})}} \cdot \frac{w(\mathcal{C})}{\sqrt{n}} \quad (\text{S.24})$$

For the well-initialized AltMin, most of the analysis stays the same, with the exception being  $\beta_n(\mathcal{M}(e_0))$ . With a small value of  $e_0$ , the index set  $\mathcal{M}(e_0)$  in the definition of  $\beta_n(\mathcal{M}(e_0))$  will shrink, so that we are able to sharpen the upper bound of  $\beta_n(\mathcal{M}(e_0))$ . The following lemma bounds the  $\beta_n(\mathcal{M}(e_0))$  at  $e_0 = \sqrt{\frac{\sigma_*^-}{\mu^+}}$ .

**Lemma S.7** *Suppose that the conditions of Lemma S.2 are satisfied with probability  $1 - \epsilon$  when  $n \geq n_0$ . Under the assumptions (A1) and (A2), if  $n \geq \max\{n_0, C_0 \cdot \max\{\tau^4, \kappa^4, 1\} \cdot \max\{w^2(\mathcal{C}), \frac{m^3}{w^2(\mathcal{C})}, m^2\}\}$ , the type-II NDI strength for  $\mathcal{M}(e_0)$  with  $e_0 = \sqrt{\frac{\sigma_*^-}{\mu^+}}$  satisfies*

$$\beta_n(\mathcal{M}(e_0)) \leq C_3 \cdot \frac{\kappa \sqrt{\mu^+} \cdot w(\mathcal{S})}{\sqrt{n}} \quad (\text{S.25})$$

with probability at least  $1 - \epsilon - C_2 \exp(-C_1 \cdot \min\{w^2(\mathcal{S}), m\})$ .

*Proof:* Throughout the proof,  $e_0$  is set as  $\sqrt{\frac{\sigma_*^-}{\mu^+}}$ , and we will use the shorthand notation  $\beta_n$  and  $\mathcal{M}$  for  $\beta_n(\mathcal{M}(e_0))$  and  $\mathcal{M}(e_0)$ . First we introduce the following notations

$$\begin{aligned} \mathcal{S}' &= e_0 \cdot \mathcal{S} = \{e_0 \mathbf{u} \mid \mathbf{u} \in \mathcal{S}\} \\ \mathbf{\Gamma}_{\mathbf{w}} &= \mathbb{E}[\mathbf{X} \mathbf{w} \mathbf{w}^T \mathbf{X}^T] \\ \mathbf{\Sigma}_{\boldsymbol{\theta}} &= \mathbf{\Sigma}_* + \mathbf{\Gamma}_{\boldsymbol{\theta} - \boldsymbol{\theta}_*} \\ \hat{\mathbf{\Gamma}}_{\mathbf{w}} &= -\frac{1}{n} \sum_{i=1}^n \mathbf{X}_i \mathbf{w} \boldsymbol{\eta}_i^T - \frac{1}{n} \sum_{i=1}^n \boldsymbol{\eta}_i \mathbf{w}^T \mathbf{X}_i + \frac{1}{n} \sum_{i=1}^n \mathbf{X}_i \mathbf{w} \mathbf{w}^T \mathbf{X}_i^T \\ \hat{\mathbf{\Sigma}}_{\boldsymbol{\theta}} &= \frac{1}{n} \sum_{i=1}^n \boldsymbol{\eta}_i \boldsymbol{\eta}_i^T + \hat{\mathbf{\Gamma}}_{\boldsymbol{\theta} - \boldsymbol{\theta}_*} = \frac{1}{n} \sum_{i=1}^n (\mathbf{y}_i - \mathbf{X}_i \boldsymbol{\theta}) (\mathbf{y}_i - \mathbf{X}_i \boldsymbol{\theta})^T \end{aligned}$$

Note that  $\mu^- \leq \lambda_{\min}(\mathbf{\Gamma}_{\mathbf{w}}) \leq \lambda_{\max}(\mathbf{\Gamma}_{\mathbf{w}}) \leq \mu^+$  for any  $\mathbf{w} \in \mathbb{S}^{p-1}$ ,  $\mathbf{\Gamma}_{\mathbf{w}} = \mathbb{E}[\hat{\mathbf{\Gamma}}_{\mathbf{w}}]$ ,  $\mathbf{\Sigma}_{\boldsymbol{\theta}} = \mathbb{E}[\hat{\mathbf{\Sigma}}_{\boldsymbol{\theta}}]$  and  $\mathcal{M} \subseteq \{\hat{\mathbf{\Sigma}}_{\boldsymbol{\theta}} \mid \boldsymbol{\theta} \in \mathcal{S}' + \boldsymbol{\theta}_*\}$ . Then we decompose  $\beta_n$  as

$$\begin{aligned} \beta_n &= \sup_{\mathbf{\Sigma} \in \mathcal{M}} \sup_{\mathbf{u} \in \mathcal{C}} \frac{2}{n} \sum_{i=1}^n \frac{\boldsymbol{\eta}_i^T \mathbf{\Sigma}^{-1} \mathbf{X}_i \mathbf{u}}{\|\mathbf{\Sigma}_*^{1/2} \mathbf{\Sigma}^{-1}\|_F} = \sup_{\mathbf{\Sigma} \in \mathcal{M}} \sup_{\mathbf{u} \in \mathcal{C}} \frac{2}{n} \sum_{i=1}^n \frac{\tilde{\boldsymbol{\eta}}_i^T \mathbf{\Sigma}_*^{1/2} \mathbf{\Sigma}^{-1} \mathbf{X}_i \mathbf{u}}{\|\mathbf{\Sigma}_*^{1/2} \mathbf{\Sigma}^{-1}\|_F} \\ &\leq \sup_{\boldsymbol{\theta} \in \mathcal{S}' + \boldsymbol{\theta}_*} \sup_{\mathbf{u} \in \mathcal{C}} \frac{2}{n} \sum_{i=1}^n \tilde{\boldsymbol{\eta}}_i^T \left( \frac{\mathbf{\Sigma}_*^{1/2} \hat{\mathbf{\Sigma}}_{\boldsymbol{\theta}}^{-1}}{\|\mathbf{\Sigma}_*^{1/2} \hat{\mathbf{\Sigma}}_{\boldsymbol{\theta}}^{-1}\|_F} - \frac{\mathbf{\Sigma}_*^{1/2} \mathbf{\Sigma}_{\boldsymbol{\theta}}^{-1}}{\|\mathbf{\Sigma}_*^{1/2} \mathbf{\Sigma}_{\boldsymbol{\theta}}^{-1}\|_F} \right) \mathbf{X}_i \mathbf{u} \\ &\quad + \sup_{\boldsymbol{\theta} \in \mathcal{S}' + \boldsymbol{\theta}_*} \sup_{\mathbf{u} \in \mathcal{C}} \frac{2}{n} \sum_{i=1}^n \frac{\tilde{\boldsymbol{\eta}}_i^T \mathbf{\Sigma}_*^{1/2} \mathbf{\Sigma}_{\boldsymbol{\theta}}^{-1} \mathbf{X}_i \mathbf{u}}{\|\mathbf{\Sigma}_*^{1/2} \mathbf{\Sigma}_{\boldsymbol{\theta}}^{-1}\|_F} \\ &\leq \underbrace{\sup_{\mathbf{\Lambda} \in \mathbb{S}^{m \times m-1}} \sup_{\mathbf{u} \in \mathcal{C}} \frac{2}{n} \sum_{i=1}^n \tilde{\boldsymbol{\eta}}_i^T \mathbf{\Lambda} \mathbf{X}_i \mathbf{u}}_{\nu_n} \cdot \underbrace{\sup_{\boldsymbol{\theta} \in \mathcal{S}' + \boldsymbol{\theta}_*} \left\| \frac{\mathbf{\Sigma}_*^{1/2} \hat{\mathbf{\Sigma}}_{\boldsymbol{\theta}}^{-1}}{\|\mathbf{\Sigma}_*^{1/2} \hat{\mathbf{\Sigma}}_{\boldsymbol{\theta}}^{-1}\|_F} - \frac{\mathbf{\Sigma}_*^{1/2} \mathbf{\Sigma}_{\boldsymbol{\theta}}^{-1}}{\|\mathbf{\Sigma}_*^{1/2} \mathbf{\Sigma}_{\boldsymbol{\theta}}^{-1}\|_F} \right\|_F}_{\zeta_n} \\ &\quad + \underbrace{\sup_{\boldsymbol{\theta} \in \mathcal{S}' + \boldsymbol{\theta}_*} \sup_{\mathbf{u} \in \mathcal{C}} \frac{2}{n} \sum_{i=1}^n \frac{\tilde{\boldsymbol{\eta}}_i^T \mathbf{\Sigma}_*^{1/2} \mathbf{\Sigma}_{\boldsymbol{\theta}}^{-1} \mathbf{X}_i \mathbf{u}}{\|\mathbf{\Sigma}_*^{1/2} \mathbf{\Sigma}_{\boldsymbol{\theta}}^{-1}\|_F}}_{\phi_n} \end{aligned}$$

where  $\nu_n$  is analyzed in the proof of Lemma S.6. Therefore we focus on bounding  $\zeta_n$  and  $\phi_n$ . We first try to bound  $\zeta_n$ ,

$$\begin{aligned}
\zeta_n &= \sup_{\theta \in S' + \theta_*} \left\| \frac{\Sigma_*^{1/2} \hat{\Sigma}_\theta^{-1}}{\|\Sigma_*^{1/2} \hat{\Sigma}_\theta^{-1}\|_F} - \frac{\Sigma_*^{1/2} \Sigma_\theta^{-1}}{\|\Sigma_*^{1/2} \Sigma_\theta^{-1}\|_F} \right\|_F \\
&\leq \sup_{\theta \in S' + \theta_*} \left\| \frac{\Sigma_*^{1/2} \hat{\Sigma}_\theta^{-1}}{\|\Sigma_*^{1/2} \hat{\Sigma}_\theta^{-1}\|_F} - \frac{\Sigma_*^{1/2} \hat{\Sigma}_\theta^{-1}}{\|\Sigma_*^{1/2} \Sigma_\theta^{-1}\|_F} \right\|_F + \sup_{\theta \in S' + \theta_*} \left\| \frac{\Sigma_*^{1/2} \hat{\Sigma}_\theta^{-1}}{\|\Sigma_*^{1/2} \Sigma_\theta^{-1}\|_F} - \frac{\Sigma_*^{1/2} \Sigma_\theta^{-1}}{\|\Sigma_*^{1/2} \Sigma_\theta^{-1}\|_F} \right\|_F \\
&\leq \sup_{\theta \in S' + \theta_*} \left| \frac{\|\Sigma_*^{1/2} \hat{\Sigma}_\theta^{-1}\|_F - \|\Sigma_*^{1/2} \Sigma_\theta^{-1}\|_F}{\|\Sigma_*^{1/2} \Sigma_\theta^{-1}\|_F} \right| + \sup_{\theta \in S' + \theta_*} \frac{\|\Sigma_*^{1/2} \hat{\Sigma}_\theta^{-1} - \Sigma_*^{1/2} \Sigma_\theta^{-1}\|_F}{\|\Sigma_*^{1/2} \Sigma_\theta^{-1}\|_F} \\
&\leq 2 \sup_{\theta \in S' + \theta_*} \frac{\|\Sigma_*^{1/2} \hat{\Sigma}_\theta^{-1} - \Sigma_*^{1/2} \Sigma_\theta^{-1}\|_F}{\|\Sigma_*^{1/2} \Sigma_\theta^{-1}\|_F} \leq 2 \sup_{\theta \in S' + \theta_*} \frac{\|\Sigma_*^{1/2} (\hat{\Sigma}_\theta^{-1} - \Sigma_\theta^{-1}) \Sigma_*^{1/2}\|_2}{\lambda_{\min}(\Sigma_*^{1/2} \Sigma_\theta^{-1} \Sigma_*^{1/2})} \cdot \|\Sigma_*^{-1/2}\|_F \\
&\leq 2 \sup_{\theta \in S' + \theta_*} \frac{\|\Sigma_*^{-1/2} (\hat{\Sigma}_\theta - \Sigma_\theta) \Sigma_*^{-1/2}\|_2 \cdot \|\Sigma_*^{1/2} \hat{\Sigma}_\theta^{-1} \Sigma_*^{1/2}\|_2 \cdot \|\Sigma_*^{1/2} \Sigma_\theta^{-1} \Sigma_*^{1/2}\|_2}{\lambda_{\min}(\Sigma_*^{1/2} \Sigma_\theta^{-1} \Sigma_*^{1/2})} \\
&= 2 \sup_{\theta \in S' + \theta_*} \frac{\|\Sigma_*^{-1/2} (\hat{\Sigma}_\theta - \Sigma_\theta) \Sigma_*^{-1/2}\|_2 \cdot \lambda_{\max}(\Sigma_*^{-1/2} \Sigma_\theta \Sigma_*^{-1/2})}{\lambda_{\min}(\Sigma_*^{-1/2} \hat{\Sigma}_\theta \Sigma_*^{-1/2}) \cdot \lambda_{\min}(\Sigma_*^{-1/2} \Sigma_\theta \Sigma_*^{-1/2})} \\
&\leq \frac{2 \sup_{\theta \in S' + \theta_*} \|\Sigma_*^{-1/2} (\hat{\Sigma}_\theta - \Sigma_\theta) \Sigma_*^{-1/2}\|_2 \cdot \sup_{\mathbf{w} \in S'} \lambda_{\max}(\Sigma_*^{-1/2} (\Sigma_* + \Gamma_{\mathbf{w}}) \Sigma_*^{-1/2})}{\inf_{\theta \in S' + \theta_*} \lambda_{\min}(\Sigma_*^{-1/2} \hat{\Sigma}_\theta \Sigma_*^{-1/2}) \cdot \inf_{\mathbf{w} \in S'} \lambda_{\min}(\Sigma_*^{-1/2} (\Sigma_* + \Gamma_{\mathbf{w}}) \Sigma_*^{-1/2})} \\
&\leq \frac{2 \sup_{\theta \in S' + \theta_*} \|\Sigma_*^{-1/2} (\hat{\Sigma}_\theta - \Sigma_\theta) \Sigma_*^{-1/2}\|_2 \cdot \left(1 + \frac{\mu^+}{\sigma_*^-} \cdot \sup_{\mathbf{w} \in S'} \|\mathbf{w}\|_2^2\right)}{(1 - 2\delta_n) \cdot \left(1 + \frac{\mu^-}{\sigma_*^+} \cdot \inf_{\mathbf{w} \in S'} \|\mathbf{w}\|_2^2\right)} \\
&\leq 8 \sup_{\theta \in S' + \theta_*} \|\Sigma_*^{-1/2} (\hat{\Sigma}_\theta - \Sigma_\theta) \Sigma_*^{-1/2}\|_2
\end{aligned}$$

where the last two steps use the conditions in Lemma S.2 and borrow some derivations from its proof. The last term can be further bounded as follows,

$$\begin{aligned}
\sup_{\theta \in S' + \theta_*} \left\| \Sigma_*^{-1/2} (\hat{\Sigma}_\theta - \Sigma_\theta) \Sigma_*^{-1/2} \right\|_2 &= \sup_{\mathbf{w} \in S'} \left\| \Sigma_*^{-1/2} \left( \frac{1}{n} \sum_{i=1}^n \tilde{\eta}_i \tilde{\eta}_i^T + \hat{\Gamma}_{\mathbf{w}} - \Sigma_* - \Gamma_{\mathbf{w}} \right) \Sigma_*^{-1/2} \right\|_2 \\
&\leq \left\| \frac{1}{n} \sum_{i=1}^n \tilde{\eta}_i \tilde{\eta}_i^T - \mathbf{I} \right\|_2 + \sup_{\mathbf{w} \in S'} \left( \left\| \frac{1}{n} \sum_{i=1}^n \Sigma_*^{-1/2} \mathbf{X}_i \mathbf{w} \tilde{\eta}_i^T \right\|_2 + \left\| \frac{1}{n} \sum_{i=1}^n \tilde{\eta}_i \mathbf{w}^T \mathbf{X}_i^T \Sigma_*^{-1/2} \right\|_2 \right) \\
&\quad + \sup_{\mathbf{w} \in S'} \left\| \Sigma_*^{-1/2} \left( \frac{1}{n} \sum_{i=1}^n \mathbf{X}_i \mathbf{w} \mathbf{w}^T \mathbf{X}_i^T - \Gamma_{\mathbf{w}} \right) \Sigma_*^{-1/2} \right\|_2 \\
&\leq \delta_n + \frac{e_0}{\sqrt{\sigma_*^-}} \cdot \sup_{\mathbf{w} \in \mathcal{C}} \left\| \frac{2}{n} \sum_{i=1}^n \mathbf{X}_i \mathbf{w} \tilde{\eta}_i^T \right\|_2 + \frac{e_0^2}{\sigma_*^-} \cdot \sup_{\mathbf{w} \in \mathcal{C}} \left\| \frac{1}{n} \sum_{i=1}^n \mathbf{X}_i \mathbf{w} \mathbf{w}^T \mathbf{X}_i^T - \Gamma_{\mathbf{w}} \right\|_2 \\
&\leq \delta_n + \frac{e_0 \gamma_n}{\sqrt{\sigma_*^-}} + \frac{e_0^2}{\sigma_*^-} \cdot \sup_{\mathbf{v} \in \mathbb{S}^{m-1}} \sup_{\mathbf{w} \in \mathcal{C}} \left| \frac{1}{n} \sum_{i=1}^n (\mathbf{w}^T \mathbf{X}_i^T \mathbf{v})^2 - \mathbb{E}(\mathbf{w}^T \mathbf{X}^T \mathbf{v})^2 \right| \\
&\leq c_1 \tau^2 \sqrt{\frac{m}{n}} + \frac{c_2 \kappa \tau (\sqrt{m} + w(\mathcal{C}))}{\sqrt{n}} + \frac{c_3 \kappa^2 (\sqrt{m} + w(\mathcal{C}))}{\sqrt{n}}
\end{aligned}$$

which holds with probability at least  $1 - c_4 \exp(-c_5 m)$  when  $n \geq c_6 \max\{\tau^4, 1\} \cdot \max\{w^2(\mathcal{C}), m\}$ . The last step follows from Proposition S.2, Lemma S.5 and intermediate results in the proof of Lemma

S.4. Hence  $\zeta_n$  can be bounded by

$$\zeta_n \leq c_T \cdot \max \{ \tau^2, \kappa^2 \} \cdot \frac{\sqrt{m} + w(\mathcal{C})}{\sqrt{n}}$$

Now we turn to bounding  $\phi_n$ . Following the idea for proving Lemma S.6, we also consider the randomness of  $\{\tilde{\eta}_i\}$  and  $\{\mathbf{X}_i\}$  sequentially. For  $\{\tilde{\eta}_i\}$ , we first have that the event

$$\mathcal{E} = \left\{ \{\tilde{\eta}_i\} \mid \sup_{\mathbf{A} \in \mathbb{S}^{m \times m-1}} \frac{1}{n} \sum_{i=1}^n \|\mathbf{A}^T \tilde{\eta}_i\|_2^2 \leq 2 \right\}$$

holds with probability at least  $1 - 2 \exp(-c'_1 m)$  if  $n \geq c'_0 \tau^4 m$ , which is shown in the proof of Lemma S.6. Now we consider the randomness of  $\{\mathbf{X}_i\}$  under any fixed  $\{\eta_i\} \in \mathcal{E}$ . We have

$$\begin{aligned} \phi_n &= \sup_{\boldsymbol{\theta} \in \mathcal{S}' + \boldsymbol{\theta}_*} \sup_{\mathbf{u} \in \mathcal{C}} \frac{2}{n} \sum_{i=1}^n \frac{\tilde{\eta}_i^T \boldsymbol{\Sigma}_*^{1/2} \boldsymbol{\Sigma}_{\boldsymbol{\theta}}^{-1} \mathbf{X}_i \mathbf{u}}{\|\boldsymbol{\Sigma}_*^{1/2} \boldsymbol{\Sigma}_{\boldsymbol{\theta}}^{-1}\|_F} \\ &\leq \frac{1}{e_0} \cdot \sup_{\mathbf{w} \in \mathcal{S}'} \sup_{\mathbf{u} \in \mathcal{S}'} \frac{2}{n} \sum_{i=1}^n \frac{\tilde{\eta}_i^T \boldsymbol{\Sigma}_*^{1/2} (\boldsymbol{\Sigma}_* + \boldsymbol{\Gamma}_{\mathbf{w}})^{-1} \mathbf{X}_i \mathbf{u}}{\|\boldsymbol{\Sigma}_*^{1/2} (\boldsymbol{\Sigma}_* + \boldsymbol{\Gamma}_{\mathbf{w}})^{-1}\|_F} \\ &= \frac{2}{e_0 \sqrt{n}} \cdot \sup_{\mathbf{t} \in \mathcal{T}} Z_{\mathbf{t}}, \end{aligned}$$

where  $Z_{\mathbf{t}} = \frac{1}{\sqrt{n}} \sum_{i=1}^n \frac{\tilde{\eta}_i^T \boldsymbol{\Sigma}_*^{1/2} (\boldsymbol{\Sigma}_* + \boldsymbol{\Gamma}_{\mathbf{w}})^{-1} \mathbf{X}_i \mathbf{u}}{\|\boldsymbol{\Sigma}_*^{1/2} (\boldsymbol{\Sigma}_* + \boldsymbol{\Gamma}_{\mathbf{w}})^{-1}\|_F}$ ,  $\mathbf{t} = (\mathbf{w}, \mathbf{u})$  and  $\mathcal{T} = \mathcal{S}' \times \mathcal{S}'$ . Note that

$$\forall \mathbf{t}, \mathbf{t}' \in \mathcal{T}, \quad \|\mathbf{t} - \mathbf{t}'\|_2 = \sqrt{\|\mathbf{w} - \mathbf{w}'\|_F^2 + \|\mathbf{u} - \mathbf{u}'\|_2^2} \leq 2\sqrt{2}e_0 \implies \text{diam}(\mathcal{T}) \leq 2\sqrt{2}e_0$$

Then we try to bound the stochastic process  $\{Z_{\mathbf{t}}\}_{\mathbf{t} \in \mathcal{T}}$  using Theorem S.1. We start with verifying the required condition.

$$\begin{aligned} &\forall \mathbf{t}, \mathbf{t}' \in \mathcal{T}, \\ &\|Z_{\mathbf{t}} - Z_{\mathbf{t}'}\|_{\psi_2} \\ &= \left\| \frac{1}{\sqrt{n}} \sum_{i=1}^n \frac{\tilde{\eta}_i^T \boldsymbol{\Sigma}_*^{1/2} (\boldsymbol{\Sigma}_* + \boldsymbol{\Gamma}_{\mathbf{w}})^{-1} \mathbf{X}_i \mathbf{u}}{\|\boldsymbol{\Sigma}_*^{1/2} (\boldsymbol{\Sigma}_* + \boldsymbol{\Gamma}_{\mathbf{w}})^{-1}\|_F} - \frac{1}{\sqrt{n}} \sum_{i=1}^n \frac{\tilde{\eta}_i^T \boldsymbol{\Sigma}_*^{1/2} (\boldsymbol{\Sigma}_* + \boldsymbol{\Gamma}_{\mathbf{w}'} )^{-1} \mathbf{X}_i \mathbf{u}'}{\|\boldsymbol{\Sigma}_*^{1/2} (\boldsymbol{\Sigma}_* + \boldsymbol{\Gamma}_{\mathbf{w}'} )^{-1}\|_F} \right\|_{\psi_2} \\ &\leq \left\| \frac{1}{\sqrt{n}} \sum_{i=1}^n \tilde{\eta}_i^T \left( \frac{\boldsymbol{\Sigma}_*^{1/2} (\boldsymbol{\Sigma}_* + \boldsymbol{\Gamma}_{\mathbf{w}})^{-1}}{\|\boldsymbol{\Sigma}_*^{1/2} (\boldsymbol{\Sigma}_* + \boldsymbol{\Gamma}_{\mathbf{w}})^{-1}\|_F} - \frac{\boldsymbol{\Sigma}_*^{1/2} (\boldsymbol{\Sigma}_* + \boldsymbol{\Gamma}_{\mathbf{w}'} )^{-1}}{\|\boldsymbol{\Sigma}_*^{1/2} (\boldsymbol{\Sigma}_* + \boldsymbol{\Gamma}_{\mathbf{w}'} )^{-1}\|_F} \right) \mathbf{X}_i \mathbf{u} \right\|_{\psi_2} \\ &\quad + \left\| \frac{1}{\sqrt{n}} \sum_{i=1}^n \frac{\tilde{\eta}_i^T \boldsymbol{\Sigma}_*^{1/2} (\boldsymbol{\Sigma}_* + \boldsymbol{\Gamma}_{\mathbf{w}'} )^{-1} \mathbf{X}_i (\mathbf{u} - \mathbf{u}')}{\|\boldsymbol{\Sigma}_*^{1/2} (\boldsymbol{\Sigma}_* + \boldsymbol{\Gamma}_{\mathbf{w}'} )^{-1}\|_F} \right\|_{\psi_2} \\ &\stackrel{(a)}{\leq} c'_2 \sqrt{\frac{1}{n} \sum_{i=1}^n \left\| \left( \frac{\boldsymbol{\Sigma}_*^{\frac{1}{2}} (\boldsymbol{\Sigma}_* + \boldsymbol{\Gamma}_{\mathbf{w}})^{-1}}{\|\boldsymbol{\Sigma}_*^{\frac{1}{2}} (\boldsymbol{\Sigma}_* + \boldsymbol{\Gamma}_{\mathbf{w}})^{-1}\|_F} - \frac{\boldsymbol{\Sigma}_*^{\frac{1}{2}} (\boldsymbol{\Sigma}_* + \boldsymbol{\Gamma}_{\mathbf{w}'} )^{-1}}{\|\boldsymbol{\Sigma}_*^{\frac{1}{2}} (\boldsymbol{\Sigma}_* + \boldsymbol{\Gamma}_{\mathbf{w}'} )^{-1}\|_F} \right)^T \tilde{\eta}_i \right\|_2^2} \cdot \sup_{\mathbf{v} \in \mathbb{S}^{m-1}} \|\mathbf{v}^T \mathbf{X} \mathbf{u}\|_{\psi_2}} \\ &\quad + c'_2 \sqrt{\frac{1}{n} \sum_{i=1}^n \left\| \left( \frac{\boldsymbol{\Sigma}_*^{\frac{1}{2}} (\boldsymbol{\Sigma}_* + \boldsymbol{\Gamma}_{\mathbf{w}'} )^{-1}}{\|\boldsymbol{\Sigma}_*^{\frac{1}{2}} (\boldsymbol{\Sigma}_* + \boldsymbol{\Gamma}_{\mathbf{w}'} )^{-1}\|_F} \right)^T \tilde{\eta}_i \right\|_2^2} \cdot \|\mathbf{u} - \mathbf{u}'\|_2 \cdot \sup_{\mathbf{v} \in \mathbb{S}^{m-1}} \left\| \mathbf{v}^T \mathbf{X} \frac{\mathbf{u} - \mathbf{u}'}{\|\mathbf{u} - \mathbf{u}'\|_2} \right\|_{\psi_2}} \\ &\stackrel{(b)}{\leq} \sqrt{2} c'_2 \kappa \sqrt{\mu^+} \left( e_0 \left\| \frac{\boldsymbol{\Sigma}_*^{\frac{1}{2}} (\boldsymbol{\Sigma}_* + \boldsymbol{\Gamma}_{\mathbf{w}})^{-1}}{\|\boldsymbol{\Sigma}_*^{\frac{1}{2}} (\boldsymbol{\Sigma}_* + \boldsymbol{\Gamma}_{\mathbf{w}})^{-1}\|_F} - \frac{\boldsymbol{\Sigma}_*^{\frac{1}{2}} (\boldsymbol{\Sigma}_* + \boldsymbol{\Gamma}_{\mathbf{w}'} )^{-1}}{\|\boldsymbol{\Sigma}_*^{\frac{1}{2}} (\boldsymbol{\Sigma}_* + \boldsymbol{\Gamma}_{\mathbf{w}'} )^{-1}\|_F} \right\|_F + \|\mathbf{u} - \mathbf{u}'\|_2 \right) \\ &\stackrel{(c)}{\leq} \sqrt{2} c'_2 \kappa \sqrt{\mu^+} (8 \|\mathbf{w} - \mathbf{w}'\|_2 + \|\mathbf{u} - \mathbf{u}'\|_2) \\ &\leq 16 c'_2 \kappa \sqrt{\mu^+} \left\| \begin{bmatrix} \mathbf{w} \\ \mathbf{u} \end{bmatrix} - \begin{bmatrix} \mathbf{w}' \\ \mathbf{u}' \end{bmatrix} \right\|_2 \implies K = 16 c'_2 \kappa \sqrt{\mu^+}, \end{aligned}$$

where step (a) follows from Lemma S.1 and step (b) follows from the event  $\mathcal{E}$ . Step (c) follows from the calculation below (similar to bounding  $\zeta_n$ ),

$$\begin{aligned}
& \left\| \frac{\Sigma_*^{1/2}(\Sigma_* + \Gamma_{\mathbf{w}})^{-1}}{\|\Sigma_*^{1/2}(\Sigma_* + \Gamma_{\mathbf{w}})^{-1}\|_F} - \frac{\Sigma_*^{1/2}(\Sigma_* + \Gamma_{\mathbf{w}'} )^{-1}}{\|\Sigma_*^{1/2}(\Sigma_* + \Gamma_{\mathbf{w}'} )^{-1}\|_F} \right\|_F \\
& \leq \left\| \frac{\Sigma_*^{1/2}(\Sigma_* + \Gamma_{\mathbf{w}})^{-1}}{\|\Sigma_*^{1/2}(\Sigma_* + \Gamma_{\mathbf{w}})^{-1}\|_F} - \frac{\Sigma_*^{1/2}(\Sigma_* + \Gamma_{\mathbf{w}'} )^{-1}}{\|\Sigma_*^{1/2}(\Sigma_* + \Gamma_{\mathbf{w}})^{-1}\|_F} \right\|_F \\
& \quad + \left\| \frac{\Sigma_*^{1/2}(\Sigma_* + \Gamma_{\mathbf{w}'} )^{-1}}{\|\Sigma_*^{1/2}(\Sigma_* + \Gamma_{\mathbf{w}})^{-1}\|_F} - \frac{\Sigma_*^{1/2}(\Sigma_* + \Gamma_{\mathbf{w}'} )^{-1}}{\|\Sigma_*^{1/2}(\Sigma_* + \Gamma_{\mathbf{w}'} )^{-1}\|_F} \right\|_F \\
& \leq \frac{2 \left\| \Sigma_*^{1/2}(\Sigma_* + \Gamma_{\mathbf{w}})^{-1} - \Sigma_*^{1/2}(\Sigma_* + \Gamma_{\mathbf{w}'} )^{-1} \right\|_F}{\left\| \Sigma_*^{1/2}(\Sigma_* + \Gamma_{\mathbf{w}})^{-1} \right\|_F} \\
& \leq \frac{2 \left\| \Sigma_*^{1/2} \left( (\Sigma_* + \Gamma_{\mathbf{w}})^{-1} - (\Sigma_* + \Gamma_{\mathbf{w}'} )^{-1} \right) \Sigma_*^{1/2} \right\|_2}{\lambda_{\min} \left( \Sigma_*^{1/2}(\Sigma_* + \Gamma_{\mathbf{w}})^{-1} \Sigma_*^{1/2} \right)} \\
& \leq \frac{2 \left\| \Sigma_*^{-1/2}(\Gamma_{\mathbf{w}} - \Gamma_{\mathbf{w}'} ) \Sigma_*^{-1/2} \right\|_2 \cdot \left\| \Sigma_*^{1/2}(\Sigma_* + \Gamma_{\mathbf{w}})^{-1} \Sigma_*^{1/2} \right\|_2 \cdot \left\| \Sigma_*^{1/2}(\Sigma_* + \Gamma_{\mathbf{w}'} )^{-1} \Sigma_*^{1/2} \right\|_2}{\lambda_{\min} \left( \Sigma_*^{1/2}(\Sigma_* + \Gamma_{\mathbf{w}})^{-1} \Sigma_*^{1/2} \right)} \\
& = \frac{2 \left\| \Sigma_*^{-1/2}(\Gamma_{\mathbf{w}} - \Gamma_{\mathbf{w}'} ) \Sigma_*^{-1/2} \right\|_2 \cdot \lambda_{\max} \left( \Sigma_*^{-1/2}(\Sigma_* + \Gamma_{\mathbf{w}}) \Sigma_*^{-1/2} \right)}{\lambda_{\min} \left( \Sigma_*^{-1/2}(\Sigma_* + \Gamma_{\mathbf{w}'} ) \Sigma_*^{-1/2} \right) \cdot \lambda_{\min} \left( \Sigma_*^{-1/2}(\Sigma_* + \Gamma_{\mathbf{w}}) \Sigma_*^{-1/2} \right)} \\
& \leq \frac{2 \|\Gamma_{\mathbf{w}} - \Gamma_{\mathbf{w}'}\|_2 \cdot \left( 1 + \frac{\mu^+}{\sigma_*^+} \|\mathbf{w}\|_2^2 \right)}{\sigma_*^- \left( 1 + \frac{\mu^-}{\sigma_*^+} \|\mathbf{w}'\|_2^2 \right) \cdot \left( 1 + \frac{\mu^-}{\sigma_*^+} \|\mathbf{w}\|_2^2 \right)} \leq \frac{4}{\sigma_*^-} \left\| \mathbb{E} [\mathbf{X} \mathbf{w} \mathbf{w}^T \mathbf{X}^T] - \mathbb{E} [\mathbf{X} \mathbf{w}' \mathbf{w}'^T \mathbf{X}^T] \right\|_2 \\
& \leq \frac{4}{\sigma_*^-} \cdot \sup_{\mathbf{v} \in \mathbb{S}^{m-1}} |\mathbf{v}^T (\mathbb{E} [\mathbf{X} \mathbf{w} \mathbf{w}^T \mathbf{X}^T] - \mathbb{E} [\mathbf{X} \mathbf{w}' \mathbf{w}'^T \mathbf{X}^T]) \mathbf{v}| \\
& \leq \frac{4}{\sigma_*^-} \left( \sup_{\mathbf{v} \in \mathbb{S}^{m-1}} |\mathbf{v}^T \mathbb{E} [\mathbf{X} \mathbf{w} (\mathbf{w} - \mathbf{w}')^T \mathbf{X}^T] \mathbf{v}| + \sup_{\mathbf{v} \in \mathbb{S}^{m-1}} |\mathbf{v}^T \mathbb{E} [\mathbf{X} (\mathbf{w} - \mathbf{w}') \mathbf{w}'^T \mathbf{X}^T] \mathbf{v}| \right) \\
& \leq \frac{8}{\sigma_*^-} \cdot \|\mathbf{w} - \mathbf{w}'\|_2 \cdot \sup_{\mathbf{v} \in \mathbb{S}^{m-1}} \sup_{\mathbf{z} \in \mathbb{S}^{p-1}} \sup_{\mathbf{r} \in \mathcal{S}'} \mathbf{v}^T \mathbb{E} [\mathbf{X} \mathbf{r} \mathbf{z}^T \mathbf{X}^T] \mathbf{v} \\
& \leq \frac{8e_0}{\sigma_*^-} \cdot \|\mathbf{w} - \mathbf{w}'\|_2 \cdot \sup_{\mathbf{v} \in \mathbb{S}^{m-1}} \sup_{\mathbf{z} \in \mathbb{S}^{p-1}} \sup_{\mathbf{r} \in \mathcal{S}'} \frac{\mathbb{E} \left( \frac{\mathbf{v}^T \mathbf{X} \mathbf{r}}{e_0} \right)^2 + \mathbb{E} (\mathbf{v}^T \mathbf{X} \mathbf{z})^2}{2} \\
& \leq \frac{8e_0}{\sigma_*^-} \cdot \|\mathbf{w} - \mathbf{w}'\|_2 \cdot \mu^+ = \frac{8}{e_0} \cdot \|\mathbf{w} - \mathbf{w}'\|_2
\end{aligned}$$

By invoking Theorem S.1, we have for  $\phi_n$  with any fixed  $\{\tilde{\eta}_i\} \in \mathcal{E}$ ,

$$\phi_n = \frac{2}{e_0 \sqrt{n}} \cdot \sup_{\mathbf{t} \in \mathcal{T}} Z_{\mathbf{t}} \leq \frac{2}{e_0 \sqrt{n}} \cdot \sup_{\mathbf{t}, \mathbf{t}' \in \mathcal{T}} |Z_{\mathbf{t}} - Z_{\mathbf{t}'}| \leq \frac{2c'_3}{e_0} \cdot \frac{\kappa \sqrt{\mu^+} \cdot w(\mathcal{T})}{\sqrt{n}} = 4c'_3 \cdot \frac{\kappa \sqrt{\mu^+} \cdot w(\mathcal{S})}{\sqrt{n}}$$

with probability at least  $1 - c'_4 \exp \left( -\frac{w^2(\mathcal{T})}{\text{diam}^2(\mathcal{T})} \right) \geq 1 - c'_4 \exp \left( -\frac{w^2(\mathcal{S})}{2} \right)$ . Now we combine the randomness of  $\mathbf{X}_i$  and  $\tilde{\eta}_i$ , and get

$$\begin{aligned}
& \mathbb{P}_{\mathbf{X}, \tilde{\eta}} \left( \phi_n \leq 4c'_3 \cdot \frac{\kappa \sqrt{\mu^+} \cdot w(\mathcal{S})}{\sqrt{n}} \right) \\
& = \int \mathbb{P}_{\mathbf{X}} \left( \phi_n \leq 4c'_3 \cdot \frac{\kappa \sqrt{\mu^+} \cdot w(\mathcal{S})}{\sqrt{n}} \mid \{\tilde{\eta}_i\} \right) p(\tilde{\eta}_1, \dots, \tilde{\eta}_n) d\tilde{\eta}_1 \dots d\tilde{\eta}_n
\end{aligned}$$



$$\begin{aligned}
&\geq \int_{\mathcal{E}} \mathbb{P}_{\mathbf{X}} \left( \phi_n \leq 4c'_3 \cdot \frac{\kappa \sqrt{\mu^+} \cdot w(\mathcal{S})}{\sqrt{n}} \mid \{\tilde{\eta}_i\} \right) p(\tilde{\eta}_1, \dots, \tilde{\eta}_n) d\tilde{\eta}_1 \dots d\tilde{\eta}_n \\
&\geq \left( 1 - c'_4 \exp \left( -\frac{w^2(\mathcal{S})}{2} \right) \right) \cdot \mathbb{P}(\mathcal{E}) \\
&\geq \left( 1 - c'_4 \exp \left( -\frac{w^2(\mathcal{S})}{2} \right) \right) (1 - 2 \exp(-c'_1 m)) \\
&\geq 1 - 2 \exp(-c'_1 m) - c'_4 \exp \left( -\frac{w^2(\mathcal{S})}{2} \right)
\end{aligned}$$

We obtain the final bound by assembling everything above. If  $n \geq \max\{n_0, C'_0 \cdot \max\{\tau^4, 1\} \cdot \max\{w^2(\mathcal{C}), m\}\}$ , with probability at least  $1 - \epsilon - C'_1 \exp(-C'_2 \min\{w^2(\mathcal{S}), m\})$ , we have

$$\begin{aligned}
\beta_n &\leq \sqrt{m} \gamma_n \zeta_n + \phi_n \\
&\leq C'_3 \cdot \max\{\tau^2, \kappa^2\} \cdot \frac{\kappa \sqrt{\mu^+} (m + w(\mathcal{C})) (\sqrt{m} + w(\mathcal{C}))}{n} + C'_4 \cdot \frac{\kappa \sqrt{\mu^+} \cdot w(\mathcal{S})}{\sqrt{n}},
\end{aligned}$$

In particular, if the sample size also satisfies  $n \geq C'_5 \cdot \max\{\tau^4, \kappa^4\} \cdot \max\left\{\frac{m^3}{w^2(\mathcal{C})}, m^2, w^2(\mathcal{C})\right\} \geq C'_6 \cdot \max\{\tau^4, \kappa^4\} \cdot \left(\frac{(m+w(\mathcal{C}))(\sqrt{m}+w(\mathcal{C}))}{w(\mathcal{S})}\right)^2$ , we further have

$$\beta_n \leq C'_7 \cdot \frac{\kappa \sqrt{\mu^+} \cdot w(\mathcal{S})}{\sqrt{n}},$$

which completes the proof.  $\blacksquare$

## 4 Proofs of Lemma 1, 2 and Theorem 1, 2

Based on the analysis presented in Section 2 and 3, now we give the proof sketches of the main results shown in the paper.

**Statement of Lemma 1:** *Under the assumptions (A1) and (A2), if the sample size  $n \geq C_0 \max\left\{1, \tau^4, \kappa^4 \left(\frac{\sigma_*^+ \mu^+}{\sigma_*^- \mu^-}\right)^2\right\} \cdot \max\left\{m, \frac{w^4(\mathcal{C})}{m}\right\}$ , with probability at least  $1 - C_2 \exp(-C_1 m)$ ,  $\hat{\Sigma}(\theta)$  given in (13) is invertible for any  $\theta \in \mathcal{R}$  and its error satisfies*

$$d_1 \left( \hat{\Sigma}(\theta), \Sigma_* \right) \leq C_3 \tau^2 \sqrt{\frac{m}{n}} + C_4 \sqrt{\frac{\mu^+}{\sigma_*^-}} \cdot d_2(\theta, \theta_*). \quad (\text{S.26})$$

*Proof:* The above error bound for  $d_1$  directly follows from the deterministic bound in Lemma S.2 and the probabilistic bounds for  $\alpha_n^-, \alpha_n^+$  (Lemma S.4),  $\delta_n$  (Proposition S.2) and  $\gamma_n$  (Lemma S.5).  $\blacksquare$

**Statement of Lemma 2:** *Under the assumptions (A1) and (A2), if the sample size  $n \geq C_0 \max\left\{1, \tau^4, \kappa^4 \left(\frac{\sigma_*^+ \mu^+}{\sigma_*^- \mu^-}\right)^2\right\} \cdot \max\left\{m, \frac{w^4(\mathcal{C})}{m}\right\}$ , then with probability at least  $1 - C_2 \exp(-C_1 m)$ , the following bound holds for  $\hat{\theta}(\Sigma)$  given in (14) with any input  $\Sigma \in \mathcal{M}(+\infty)$ ,*

$$d_2 \left( \hat{\theta}(\Sigma), \theta_* \right) \leq (1 + d_1(\Sigma, \Sigma_*)) \cdot \frac{C_4 \kappa \sqrt{\mu^+}}{\mu^- \sqrt{\text{Tr}(\Sigma_*^{-1})}} \cdot \frac{m + w(\mathcal{C})}{\sqrt{n}}, \quad (\text{S.27})$$

where  $\xi(\Sigma)$  is given in Definition 1.

*Proof:* The above error bound for  $d_2$  directly follows from the deterministic bound in Lemma S.3 and the probabilistic bounds for  $\alpha_n^-, \alpha_n^+$  (Lemma S.4),  $\delta_n$  (Proposition S.2),  $\gamma_n$  (Lemma S.5) and  $\beta_n(\mathcal{M}(e_0))$  with  $e_0 = +\infty$  (Lemma S.6). ■

**Statement of Theorem 1:** *Under the assumptions (A1) and (A2), if the sample size  $n \geq C_0 \cdot \max \left\{ 1, \tau^4, \kappa^4 \left( \frac{\mu^+ \sigma_+^+}{\mu^- \sigma_-^-} \right)^2, \kappa^2 \left( \frac{\mu^+}{\mu^-} \right)^2 \left( \frac{\sigma_+^+}{\sigma_-^-} \right) \right\} \cdot \max \left\{ \frac{w^4(\mathcal{C})}{m}, m \right\}$ , and  $\hat{\theta}_{(0)}$  is a feasible initialization (i.e.,  $f(\hat{\theta}_{(0)}) \leq f(\theta_*)$ ), then with probability at least  $1 - C_2 \exp(-C_1 m)$ , the following error bound holds for  $\hat{\theta}_{(T)}$  returned by Algorithm 1*

$$\left\| \hat{\theta}_{(T)} - \theta_* \right\|_2 \leq e_{\min} + \rho_n^T \cdot \left( \left\| \hat{\theta}_{(0)} - \theta_* \right\|_2 - e_{\min} \right), \quad (\text{S.28})$$

in which  $\rho_n$  and  $e_{\min}$  satisfy the inequalities below with  $\delta_n = C_5 \tau^2 \sqrt{\frac{m}{n}} \leq \frac{1}{4}$ ,

$$\rho_n \leq \frac{C_3 \kappa \mu^+}{\mu^- \sqrt{\sigma_-^- \text{Tr}(\Sigma_*^{-1})}} \cdot \frac{m + w(\mathcal{C})}{\sqrt{n}} \leq \frac{1}{2}, \quad e_{\min} \leq \frac{C_4 \kappa \sqrt{\mu^+}}{\mu^- \sqrt{\text{Tr}(\Sigma_*^{-1})}} \cdot \frac{m + w(\mathcal{C})}{\sqrt{n}} \cdot \frac{1 + \delta_n}{1 - \rho_n}, \quad (\text{S.29})$$

*Proof:* The above error bound for AltMin directly follows from the deterministic bound in Theorem S.3 and the probabilistic bounds for  $\alpha_n^-, \alpha_n^+$  (Lemma S.4),  $\delta_n$  (Proposition S.2),  $\gamma_n$  (Lemma S.5) and  $\beta_n(\mathcal{M}(e_0))$  with  $e_0 = +\infty$  (Lemma S.6). ■

**Statement of Theorem 2:** *Under the assumptions (A1) and (A2), if the sample size  $n \geq C_0 \cdot \max \left\{ 1, \tau^4, \kappa^4 \left( \frac{\mu^+ \sigma_+^+}{\mu^- \sigma_-^-} \right)^2, \kappa^2 \left( \frac{\mu^+}{\mu^-} \right)^2 \left( \frac{\sigma_+^+}{\sigma_-^-} \right) \right\} \cdot \max \left\{ \frac{w^4(\mathcal{C})}{m}, \frac{m^3}{w^2(\mathcal{C})}, m^2 \right\}$ , and a feasible initialization  $\hat{\theta}_{(0)}$  satisfies  $\left\| \hat{\theta}_{(0)} - \theta_* \right\|_2 \leq \sqrt{\frac{\sigma_-^-}{\mu^+}}$ , then with probability at least  $1 - C_2 \exp(-C_1 \cdot \min \{w^2(\mathcal{C}), m\})$ , the error bound (30) holds for  $\hat{\theta}_{(T)}$  returned by Algorithm 1 with  $\rho_n$  and  $e_{\min}$  satisfying*

$$\rho_n \leq \frac{C_3 \kappa \mu^+}{\mu^- \sqrt{\sigma_-^- \text{Tr}(\Sigma_*^{-1})}} \cdot \frac{w(\mathcal{S})}{\sqrt{n}} \leq \frac{1}{2}, \quad e_{\min} \leq \frac{C_4 \kappa \sqrt{\mu^+}}{\mu^- \sqrt{\text{Tr}(\Sigma_*^{-1})}} \cdot \frac{w(\mathcal{S})}{\sqrt{n}} \cdot \frac{1 + \delta_n}{1 - \rho_n}, \quad (\text{S.30})$$

where  $\delta_n$  is the same as the one given in Theorem 1.

*Proof:* The improved error bound directly follows from the deterministic bound in Theorem S.3 and the probabilistic bounds for  $\alpha_n^-, \alpha_n^+$  (Lemma S.4),  $\delta_n$  (Proposition S.2),  $\gamma_n$  (Lemma S.5) and  $\beta_n(\mathcal{M}(e_0))$  with  $e_0 = \sqrt{\frac{\sigma_-^-}{\mu^+}}$  (Lemma S.7). ■

## References

- [1] P. J. Bickel, Y. Ritov, and A. B. Tsybakov. Simultaneous analysis of Lasso and Dantzig selector. *The Annals of Statistics*, 37(4):1705–1732, 2009.
- [2] S. Mendelson. Upper bounds on product and multiplier empirical processes. *Stochastic Processes and their Applications*, 126(12):3652 – 3680, 2016.
- [3] M. Talagrand. *The Generic Chaining*. Springer, 2005.
- [4] M. Talagrand. *Upper and Lower Bounds for Stochastic Processes*. Springer, 2014.
- [5] R. Vershynin. Introduction to the non-asymptotic analysis of random matrices. In Y. Eldar and G. Kutyniok, editors, *Compressed Sensing*, chapter 5, pages 210–268. Cambridge University Press, 2012.
